# Supplementary material for: Sepsis-associated mortality in England: an analysis of multiple cause of death data from 2001 to 2010
Source: PubMed Central journal article supplement — BMJ Open. 2013 Aug 2;3(8):e002586. doi: 10.1136/bmjopen-2013-002586 (PMC3733313; doi:10.1136/bmjopen-2013-002586), 2013-08-02
Supplement: bmjopen-2013-002586.draft_revisions.pdf [file bmjopen-2013-002586.draft_revisions.pdf]

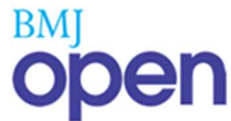

**Sepsis-associated mortality in England: an analysis of multiple cause of death data from 2001 to 2010.**

|                                 |                                                                                                                                                                                                                                                                                                                                                                                                                                                                                         |
|---------------------------------|-----------------------------------------------------------------------------------------------------------------------------------------------------------------------------------------------------------------------------------------------------------------------------------------------------------------------------------------------------------------------------------------------------------------------------------------------------------------------------------------|
| Journal:                        | <i>BMJ Open</i>                                                                                                                                                                                                                                                                                                                                                                                                                                                                         |
| Manuscript ID:                  | bmjopen-2013-002586                                                                                                                                                                                                                                                                                                                                                                                                                                                                     |
| Article Type:                   | Research                                                                                                                                                                                                                                                                                                                                                                                                                                                                                |
| Date Submitted by the Author:   | 11-Jan-2013                                                                                                                                                                                                                                                                                                                                                                                                                                                                             |
| Complete List of Authors:       | McPherson, Duncan; Portsmouth Hospitals NHS Trust, Anaesthesia; Imperial College London, Institute of Global Health Innovation<br>Griffiths, Clare; London Health Observatory,<br>Williams, Matthew; Portsmouth Hospitals NHS Trust, Critical Care Medicine<br>Baker, Allan; London Health Observatory,<br>Klodawski, Ed; London Health Observatory,<br>Jacobson, Bobbie; London Health Observatory,<br>Donaldson, Liam; Imperial College London, Institute of Global Health Innovation |
| <b>Primary Subject Heading</b>: | Public health                                                                                                                                                                                                                                                                                                                                                                                                                                                                           |
| Secondary Subject Heading:      | Research methods, Intensive care, Infectious diseases, Health policy, Epidemiology                                                                                                                                                                                                                                                                                                                                                                                                      |
| Keywords:                       | STATISTICS & RESEARCH METHODS, EPIDEMIOLOGY, Health policy < HEALTH SERVICES ADMINISTRATION & MANAGEMENT, Public health < INFECTIOUS DISEASES, Adult intensive & critical care < INTENSIVE & CRITICAL CARE, PUBLIC HEALTH                                                                                                                                                                                                                                                               |
|                                 |                                                                                                                                                                                                                                                                                                                                                                                                                                                                                         |

SCHOLARONE™  
Manuscripts

1  
2  
3  
4  
5  
6  
7  
8  
9  
10  
11  
12  
13  
14  
15  
16  
17  
18  
19  
20  
21  
22  
23  
24  
25  
26  
27  
28  
29  
30  
31  
32

## ***Sepsis-associated mortality in England: an analysis of multiple cause of death data from 2001 to 2010***

Duncan McPherson, postgraduate student,<sup>1,3</sup> Clare Griffiths, programme manager,<sup>2</sup> Matthew Williams, consultant,<sup>3</sup> Allan Baker, senior public health information analyst,<sup>2</sup> Ed Klodawski, public health information analyst,<sup>2</sup> Bobbie Jacobson, director<sup>2</sup>, Liam Donaldson, chair in health policy<sup>1</sup>

1. Imperial College London, 10th Floor QEQM building, St Mary's Hospital, Praed Street, London, W2 1NY
2. London Health Observatory, Stephenson House, 75 Hampstead Road, London NW1 2PL
3. Portsmouth Hospitals NHS Trust, Southwick Hill Road, Cosham, Portsmouth, PO6 3LY

33  
34  
35  
36  
37  
38  
39  
40  
41  
42  
43  
44  
45  
46  
47  
48  
49  
50  
51  
52  
53  
54  
55  
56  
57  
58  
59  
60

Correspondence to: Dr Duncan McPherson, Department of Anaesthesia, Portsmouth Hospitals NHS Trust, Southwick Hill Road, Cosham, Portsmouth, PO6 3LY.

[duncan.mcpherson@nhs.net](mailto:duncan.mcpherson@nhs.net).

Contents: 2 figures, 4 tables, 1 appendix.

## **Abstract**

### **Objectives**

To quantify mortality associated with sepsis in the whole population of England.

### **Design**

Descriptive statistics of multiple cause of death data.

### **Setting**

England between 2001 and 2010.

### **Participants**

All people whose death was registered in England between 2001 and 2010 and whose certificate contained a sepsis associated International Classification of Diseases, Tenth Revision (ICD-10) code.

### **Data sources**

Multiple cause of death data extracted from Office for National Statistics mortality database.

### **Statistical methods**

Age and sex specific death rates and directly age standardised death rates.

### **Results**

In 2010, 5.1% of deaths in England were definitely associated with sepsis. Adding those that may be associated with sepsis increases this figure to 7.7% of all deaths. Only 8.6% of deaths definitely associated with sepsis in 2010 had a sepsis related condition as the underlying cause of death. 99% of deaths definitely associated with sepsis have one of three ICD-10 codes, A40, A41 and P36, in at least one position on the death

1  
2  
3 certificate. 7% of deaths definitely associated with sepsis in 2001-10 did not occur in  
4  
5 hospital.  
6  
7

### 8 **Conclusions**

9  
10 Sepsis is a major public health problem in England. In attempting to tackle the  
11  
12 problem of sepsis it is not sufficient to rely on hospital based statistics, or methods of  
13  
14 intervention, alone. A robust estimate of the burden of sepsis associated mortality in  
15  
16 England can be made by identifying deaths with one of three ICD-10 codes in multiple  
17  
18 cause of death data. These three codes could be used for future monitoring of the  
19  
20 burden of sepsis-associated mortality.  
21  
22  
23  
24  
25  
26  
27  
28  
29  
30  
31  
32  
33  
34  
35  
36  
37  
38  
39  
40  
41  
42  
43  
44  
45  
46  
47  
48  
49  
50  
51  
52  
53  
54  
55  
56  
57  
58  
59  
60

## Summary

### Article Focus

- A large proportion of patients admitted to critical care units with sepsis die and if sepsis is identified and treated earlier, mortality can be reduced producing cost-effective benefits in terms of life years/quality-adjusted life years gained;
- Assessing sepsis-associated mortality is not straightforward as there are no codes for sepsis in ICD-10 and sepsis-related conditions are often not selected as the underlying cause of death;
- Multiple cause of death data are now available for deaths in the UK and provide a way of determining those that are associated with sepsis.

### Key Messages

- In 2001-10, one in twenty deaths in England was associated with sepsis;
- 99% of deaths definitely associated with sepsis include one of three ICD-10 codes, A40, A41 and P36, somewhere on the list of causes of death;
- These deaths occur across a wide range of specialty areas and 15,000 (7%) deaths definitely associated with sepsis in 2001-10 did not occur in hospital; this should prompt a much wider population-based approach to future quality improvement.

### Strengths and Limitations

- Multiple Cause of Death data are collected for all deaths, allowing us to count all those whose death is associated with sepsis, not just those who die in hospital, or those for whom septicaemia is the underlying cause;
- Our population estimates are based on the 2001 UK census, which will shortly be updated by the 2011 Census;

1  
2  
3  
4  
5  
6  
7  
8  
9  
10  
11  
12  
13  
14  
15  
16  
17  
18  
19  
20  
21  
22  
23  
24  
25  
26  
27  
28  
29  
30  
31  
32  
33  
34  
35  
36  
37  
38  
39  
40  
41  
42  
43  
44  
45  
46  
47  
48  
49  
50  
51  
52  
53  
54  
55  
56  
57  
58  
59  
60

- The study relies on the accuracy of coding. There is no specific code for sepsis within ICD-10, which may lead to misclassification of causes. We may have underestimated the true impact of sepsis.

For peer review only

## Introduction

Sepsis is defined as systemic inflammatory response syndrome caused by infection.<sup>1</sup>  
<sup>2</sup> Severe sepsis is sepsis with organ system dysfunction, while septic shock is defined as sepsis with hypotension refractory to fluid resuscitation, leading to inadequate tissue perfusion. These entities lie on a spectrum of diseases culminating with death caused by multiple organ dysfunction.

Twenty seven per cent of intensive care admissions in England and Wales are for severe sepsis and almost half of these patients die in hospital.<sup>3</sup> In 1995-96, in an adult general intensive care unit (ICU) in a UK university hospital, the median cost of treating a patient with sepsis was six times the cost of treating a patient without sepsis. The mortality rate was also significantly higher for the sepsis patients, despite the increased spending, at 53% compared with 29% for non-sepsis patients.<sup>4</sup> More recent studies have found that using integrated sepsis treatment protocols, including those developed by the International Surviving Sepsis Campaign, can be effective at reducing mortality rates.<sup>5-7</sup> Such protocols may increase costs through lengthier ICU stays, but appear cost-effective in terms of life years and quality-adjusted life years gained. Estimates of the incidence of sepsis, and associated mortality, are hard to obtain. Recent estimates suggest that the incidence of severe sepsis in the general population is 38 per 100,000 in Finland<sup>8</sup> and 25 per 100,000 in Spain<sup>9</sup>. However, these estimates are based on administrative in-patient data. It is likely that these underestimate the incidence of sepsis as they only count those admitted to hospital. Using multiple cause of death (MCO) data it has been estimated that 6% of all deaths in the USA are associated with sepsis.<sup>10</sup>

In 1993, the redevelopment of the Office for National Statistics (ONS) mortality database allowed all the diseases and conditions mentioned on the death certificate to be coded and stored. Up to 15 mentioned causes of death can be coded, in addition to

1  
2  
3 the underlying and secondary causes of death.<sup>11</sup> MCOD data have been used in England  
4  
5 to examine the contribution to mortality of many different diseases and conditions.<sup>12-17</sup>  
6  
7 Analysis of mortality by cause of death usually uses the underlying cause of death, which  
8  
9 is the “disease or injury which initiated the train of morbid events leading directly to  
10  
11 death or the circumstances of the accident or violence which produced the fatal  
12  
13 injury.”<sup>18</sup> For many patients, sepsis may be part of that causal sequence, but it would not  
14  
15 be listed as the underlying cause of death. For example, in cases where sepsis is  
16  
17 hospital-acquired, the original reason for hospitalisation would generally be the  
18  
19 underlying cause of death. Consequently, examining mortality from sepsis using the  
20  
21 underlying cause of death would not identify those deaths as being sepsis-associated.  
22  
23

24  
25 In this paper MCOD data have been used to estimate the number of deaths in  
26  
27 England associated with sepsis.  
28  
29  
30  
31  
32  
33  
34  
35  
36  
37  
38  
39  
40  
41  
42  
43  
44  
45  
46  
47  
48  
49  
50  
51  
52  
53  
54  
55  
56  
57  
58  
59  
60



## Methods

Mortality data were obtained from the Office for National Statistics (ONS) mortality database, for the period from 2001 to 2010. As sepsis deaths cannot be directly identified in ICD-10, a list of codes related to sepsis was selected. Using the underlying question, "If this condition appears on the death certificate, what is the chance this person would have had sepsis?" a list of conditions was derived. These were then divided into two categories: those definitely meaning sepsis was involved and those that may mean sepsis was involved. The ICD-10 codes associated with these conditions were identified using the ICD-10 index<sup>19</sup> and online searching tool developed by WHO and the German Institute of Medical Documentation and Information<sup>20</sup>. The first three authors then reviewed the list of codes, by asking the question "If this code was recorded on a death certificate, what is the probability that the deceased had severe sepsis?" If the probability was considered to be more than 50% then the code was included in a candidate list. This candidate list of codes was crosschecked with the Melamed paper<sup>10</sup> and the ICD "List of conditions unlikely to cause death"<sup>21</sup> to ensure that no unlikely codes were included and that no likely codes had been overlooked. The ICD-10 codes that are definitely or maybe associated with sepsis are listed in the Appendix.

Deaths were extracted from the mortality database if they had a mention of any of the identified codes anywhere on the death certificate. Age- and sex-specific rates were calculated using mid-year population estimates for England, published in June 2010, as denominators for the relevant year and, where appropriate, death rates were directly age-standardised using the European Standard Population.

To look at patterns of sepsis-associated mortality, we also examined the underlying cause of death for these deaths, other co-morbidities mentioned on the certificate, and the total number of contributing causes mentioned on the death certificate. We compared these with overall patterns for all deaths in England. We also examined

1  
2  
3 sepsis-associated mortality by place of death: home, hospital, care home etc. We  
4  
5 restricted these analyses to those deaths definitely considered to be sepsis-associated.  
6  
7 Deaths under 28 days have a separate death certificate and only mentioned causes are  
8  
9 coded for these deaths - an underlying cause of death cannot be selected from them.<sup>22</sup>  
10  
11 These deaths were included in the majority of analyses in this study and where they  
12  
13 have been excluded this has been noted in the results.  
14  
15  
16  
17  
18  
19  
20  
21  
22  
23  
24  
25  
26  
27  
28  
29  
30  
31  
32  
33  
34  
35  
36  
37  
38  
39  
40  
41  
42  
43  
44  
45  
46  
47  
48  
49  
50  
51  
52  
53  
54  
55  
56  
57  
58  
59  
60

## Results

Between 2001 and 2010 there were 226,547 deaths that were definitely directly associated with sepsis in England, 4.7% of all deaths. Adding those that may be related to sepsis increased this to 332,757, 6.9% of all deaths. In 2010 alone, 5.1% of deaths were definitely associated with sepsis, and adding in those deaths that may be related increased that percentage to 7.7%. Figure 1 shows mortality rates for deaths that are definitely and maybe linked to sepsis for each year. For both sexes combined, the rate rose to a peak in 2007 and then declined. Excluding the 'maybe' group brings the peak in mortality forward to 2006. The number of deaths definitely associated with sepsis was also highest in 2006. The number rose from 16,800 in 2001 to a peak of 26,150 in 2006, before decreasing every year to 23,700 in 2010. The remaining analyses in this paper present results only for those deaths definitely associated with sepsis.

In 2010, the percentage of deaths associated with sepsis was higher for females (5.5%) than males (4.8%). However, when directly age-standardised rates were calculated (which take into account differences in the age structures of the population between the sexes) the rate in 2010 was higher for males (29.8 deaths per 100,000 population) than females (24.8 per 100,000). Between 2001 and 2010, the annual death rate for males was 20-28 per cent higher than the rate for females.

Age-specific mortality rates were higher in the very youngest and elderly, with the rate in the under 1s being similar to the rate among those in their 60s (figure 2). At younger ages, the rate declined rapidly after age 1. In 2001-10, the age-specific mortality rate for deaths associated with sepsis in ages 5-14 was less than 1 per 100,000 population for both males and females. Rates then rose with age, with particularly marked increases in the oldest age groups. For both males and females, the rate in the 85+ age group was double the rate for those aged 80-84. The age-specific rate for males was higher than females for deaths under age 5 and for every age group from age 30

1  
2  
3 onwards. For deaths at age 85 and over, the age-specific rate for men was 822 deaths  
4 per 100,000 population, compared to 683 per 100,000 for women.  
5  
6

7  
8 Table 1 shows the underlying cause of death for deaths that are definitely sepsis-  
9 associated, by chapter of the ICD, and the percentage of each ICD chapter that is sepsis-  
10 associated. Deaths with a mention of sepsis are spread across a wide spectrum of ICD  
11 chapters. The ICD chapter that accounts for the biggest percentage of sepsis-associated  
12 deaths is genitourinary diseases (17.8%). The leading causes of death also account for  
13 high percentages, such as respiratory diseases (15.4%), digestive diseases (14.0%),  
14 cancer (13.4%) and circulatory diseases (11.5%), while 11.7% of deaths have an  
15 underlying cause in the infectious diseases chapter. Almost half of deaths with an  
16 underlying cause of infectious disease are associated with sepsis (49.1%). There are  
17 wide differences in the percentages in other chapters. Only 1.5% of circulatory disease  
18 deaths are associated with sepsis, but for deaths with an underlying cause of skin  
19 disease, three-quarters are associated with sepsis (75.7%). Twenty per cent of deaths  
20 from diseases originating in the perinatal period also had a sepsis-associated cause of  
21 death on the death certificate. However, it must be borne in mind that deaths under 28  
22 days were not included in the analysis of deaths by underlying cause as a different death  
23 certificate is used to register these deaths in England (Office for National Statistics  
24 2009).<sup>22</sup>  
25  
26  
27  
28  
29  
30  
31  
32  
33  
34  
35  
36  
37  
38  
39  
40  
41  
42  
43

44 We also examined the percentage of sepsis-associated deaths where sepsis was also  
45 the underlying cause of death. For deaths definitely considered to be sepsis-associated,  
46 this was 8.6% in 2010. Of the cases definitely associated with sepsis, 99% contained one  
47 of three ICD-10 codes in at least one position on the death certificate: A40 (streptococcal  
48 septicaemia), A41 (other septicaemia) and P36 (bacterial sepsis of newborn).  
49  
50  
51  
52  
53  
54

55 Table 2 shows the total number of causes mentioned on the death certificate for all  
56 deaths and for sepsis-associated deaths. Sepsis-associated deaths tend to have more  
57  
58  
59  
60

1  
2  
3 conditions mentioned than do all deaths. For all deaths, two is the most common  
4  
5 number of causes mentioned, whereas for sepsis-associated deaths the most common  
6  
7 number is three. Very few sepsis-associated deaths have only one cause of death on the  
8  
9 death certificate. This is because 'sepsis' alone is not sufficient detail to allow the death  
10  
11 to be registered without reference to a coroner – the certificate must mention the cause  
12  
13 of the sepsis for this to be acceptable under law. However, it also seems that overall,  
14  
15 sepsis-associated deaths have proportionally more conditions mentioned, as might be  
16  
17 expected given the severity of illness amongst these individuals. For sepsis-associated  
18  
19 deaths, 23.2% have five or more conditions mentioned, compared with 7.2% of all  
20  
21 deaths. Neonatal deaths were excluded from this part of the analysis, because the  
22  
23 conditions mentioned on their death certificates include conditions in the mother and in  
24  
25 the baby, so they are not directly comparable to those deaths where the deceased was  
26  
27 aged 28 days or older.  
28  
29

30  
31 Many of the chronic conditions known to be associated with sepsis appear on the  
32  
33 death certificates of sepsis-associated deaths – 16.8% of certificates mentioned cancer,  
34  
35 and 9.4% diabetes (table 3).  
36  
37

38 Table 4 shows that 93.4% of all sepsis-associated deaths took place in hospital,  
39  
40 compared with 55.6% of all deaths. Nearly 7% of sepsis-associated deaths therefore did  
41  
42 not take place in hospital. Less than 2% of sepsis-associated deaths occurred in the  
43  
44 deceased's own home, compared with nearly 20% of all deaths. Almost 8% of deaths in  
45  
46 hospital were associated with sepsis, compared to less than half a percent of deaths that  
47  
48 took place in the deceased's own home, hospices, or elsewhere.  
49  
50  
51  
52  
53  
54  
55  
56  
57  
58  
59  
60

## Discussion

We have estimated that at least one in twenty of all deaths in England are associated with sepsis. The sepsis-associated death rate has been increasing over the last decade, reaching a peak in 2006. The rate has decreased in more recent years, but not yet to the level in the earlier part of the decade. We have shown that 6.6% of patients with definite severe sepsis die outside of a hospital, indicating that in 2001-10 up to 15,000 deaths associated with sepsis may have been missed if we had only counted deaths in hospital. Sepsis-associated deaths appear to have larger numbers of conditions on their death certificates than do all deaths.

Our study does have some limitations. In using multiple cause of death data, it relies on the accuracy of the recording of causes of death on the death certificate. As a study of sepsis-associated deaths in the US has noted, codes for septicaemia have to be used as a proxy for sepsis in ICD-10. There is a risk that this may lead to misclassification of deaths, and possibly an under-estimation of the burden of sepsis-related mortality.<sup>10</sup> We should also note that our mortality rates were calculated using mid-year population estimates which are based on the 2001 Census. In December 2012, ONS plan to release revised mid-year estimates for England, which will take into account the results of the 2011 Census.

Our estimate of deaths associated with sepsis is similar to that found in the USA using a similar method.<sup>10</sup> Many current estimates of mortality due to sepsis look at patients admitted to hospital and who subsequently die, giving an indication of case fatality. It is estimated that the mortality of patients admitted to critical care units and diagnosed with severe sepsis is 47%.<sup>3</sup> Our study is population-based and therefore gives an indication of the burden of sepsis across the whole population. Most analyses of cause of death data only look at the underlying cause, which identifies the disease or injury that initiated the events leading to death. We have shown, however, that less than

1  
2  
3 10% of deaths associated with sepsis have it as the underlying cause. To fully account  
4 for sepsis-related mortality, it is therefore necessary to examine all the recorded causes  
5 of death, as we have done. Although this analysis is more complex than just examining  
6 the underlying cause of death, we have shown that just three ICD-10 codes – A40, A41  
7 and P36 – identify 99% of deaths definitely associated with sepsis. These three codes  
8 alone could therefore be used for future monitoring and audit of the burden and quality  
9 of sepsis care using multiple cause of death data. However, regular review of the ICD-10  
10 codes definitely or possibly associated with sepsis (and the number of deaths with these  
11 codes) would be worthwhile as ICD codes are updated. For example, a code for  
12 necrotising fasciitis, M72.6, was added by the WHO as an update to ICD-10, but not  
13 implemented for coding by ONS until 2011. As the presence of this code on a death  
14 certificate may indicate sepsis, this could be considered in future analyses, but counting  
15 deaths with one of just the three identified ICD-10 codes would still find the vast  
16 majority of sepsis-associated mortality.  
17  
18  
19  
20  
21  
22  
23  
24  
25  
26  
27  
28  
29  
30  
31  
32

33 Sepsis can no longer be regarded as a niche problem relevant only to the critical care  
34 units that treat the most severely affected patients. There is some evidence that  
35 recognition of sepsis may be low outside hospitals. For example, patients diagnosed  
36 with severe sepsis in one US emergency department were reviewed.<sup>23</sup> Only half of these  
37 patients had been transported to hospital by ambulance. In this half of cases, the  
38 paramedic had explicitly considered sepsis in only a fifth. For those patients where  
39 paramedics had recognised sepsis, there was a significant decrease in time taken to  
40 receive antibiotic treatment. By the time patients with sepsis are admitted to critical  
41 care, they are very severely unwell and therefore likely to die despite the best efforts of  
42 their healthcare team. There is also evidence that treating patients with sepsis earlier  
43 and in a more coordinated manner reduces mortality.<sup>24</sup> Therefore, if we could find ways  
44 to encourage earlier diagnosis and earlier, coordinated treatment, it is probable that the  
45 overall mortality from sepsis could be reduced. The reduction of sepsis related mortality  
46  
47  
48  
49  
50  
51  
52  
53  
54  
55  
56  
57  
58  
59  
60

1  
2  
3 since 2007 may represent the results of the introduction of changes to identify such  
4 patients, e.g. Early Warning Scoring (EWS) systems, Critical Care Outreach, efforts to  
5 improve awareness and training (e.g. Surviving Sepsis Campaign). However, we contend  
6 there is clearly room for further improvements. There is growing consensus that the  
7 clinical treatment of severely ill patients is best done initially in a general way, avoiding  
8 over emphasis on identifying the exact cause of sepsis. The most important element of  
9 the treatment of sepsis is to recognise that severe illness is present early and rapidly  
10 institute appropriate treatment (with targeted but broad spectrum antibiotics and  
11 source control) and resuscitation that aims to correct the physiological abnormalities  
12 associated with sepsis, whatever the underlying cause. Resuscitation efforts are generic,  
13 as many elements of the sepsis syndrome are common whatever the causal pathogen,  
14 but are important as part of the “bundle of care” if mortality is to be lowered.  
15  
16  
17  
18  
19  
20  
21  
22  
23  
24  
25  
26  
27  
28

29 This study provides further evidence that sepsis is a major public health problem in  
30 England as well as elsewhere in the world. We hope that this result, and this method of  
31 using multiple cause of death data, will form the basis of a more accurate, and ongoing,  
32 accounting of the burden of sepsis among the population of England as well as a tool to  
33 support audit of the quality of sepsis diagnosis and treatment across the whole  
34 healthcare system. Estimating sepsis-associated mortality from multiple cause of death  
35 data (rather than estimates based on hospital patients) would also allow more detailed  
36 analyses to be undertaken, such as investigating geographic or socio-economic  
37 inequalities in these deaths. This would be a profitable area for future research. It also  
38 allows a more nuanced debate to take place, which should now involve policy makers,  
39 public health services, primary and emergency care providers as well as critical care  
40 specialists. Ultimately, having this more detailed picture should enable improved quality  
41 of care and more cost-effective use of resources with respect to preventing, identifying  
42 and treating sepsis.  
43  
44  
45  
46  
47  
48  
49  
50  
51  
52  
53  
54  
55  
56  
57  
58  
59  
60



**Figures**

Figure 1. Directly age-standardised rates of death definitely, black, and maybe, grey, associated with sepsis, England 2001-10.

Figure 2. Age specific death rates for males, black, and females, grey, of deaths definitely associated with sepsis, England, 2001-10.

For peer review only

**Tables**

Table 1. Deaths that are definitely associated with sepsis, by underlying cause of death and comparison with all deaths, occurring in England 2001-10 excluding neonatal deaths.

Table 2. Percentage of deaths with given number of diseases or conditions mentioned on the death certificate in deaths definitely associated with sepsis, excluding neonatal deaths, compared with all deaths in England 2001-10.

Table 3. Co-morbidities mentioned on the death certificates of deaths definitely associated with sepsis, excluding neonatal deaths, in England 2001-10.

Table 4: Deaths definitely associated with sepsis, excluding neonatal deaths, compared with all deaths by place of death in England 2001-10.

## **Footnotes**

## **Copyright**

The Corresponding Author has the right to grant on behalf of all authors and does grant on behalf of all authors, an exclusive licence (or non exclusive for government employees) on a worldwide basis to the BMJ Publishing Group Ltd to permit this article (if accepted) to be published in BMJ editions and any other BMJ PGL products and sublicences such use and exploit all subsidiary rights, as set out in our licence.

## **Contributors**

DMcP, CG and MW compiled the list of ICD-10 codes to be searched. AB and EK extracted and tabulated the mortality data and calculated death rates. All authors made substantial contributions to conception and design, acquisition of data, or analysis and interpretation of data. All authors took part in drafting the article or revising it critically for important intellectual content and gave final approval of the version to be published. DMcP is the guarantor.

## **Funding**

The departments of the authors funded this study.

## **Competing interests**

All authors have completed the Unified Competing Interest form at [www.icmje.org/coi\\_disclosure.pdf](http://www.icmje.org/coi_disclosure.pdf) (available on request from the corresponding author) and declare: no support from any organisation for the submitted work; no financial relationships with any organisations that might have an interest in the submitted work in the previous 3 years; no other relationships or activities that could appear to have influenced the submitted work.

## **Ethical Approval**

1  
2  
3 Ethical approval was not required for this study.  
4  
5

6  
7 **Data Sharing**

8 No additional data available. The London Health Observatory holds individual  
9 mortality data but these records cannot be shared under the terms of the data access  
10 agreement with the Office for National Statistics who provide the data.  
11  
12  
13  
14  
15  
16  
17  
18  
19  
20  
21  
22  
23  
24  
25  
26  
27  
28  
29  
30  
31  
32  
33  
34  
35  
36  
37  
38  
39  
40  
41  
42  
43  
44  
45  
46  
47  
48  
49  
50  
51  
52  
53  
54  
55  
56  
57  
58  
59  
60

## References

1. The ACCP/SCCM consensus conference committee. Definitions for sepsis and organ failure and guidelines for the use on innovative therapies in sepsis. *Chest* 1992; 101(6): 1481-3.
2. Levy MM, Fink MP, Marshall JC, et al. SCCM/ESICM/ACCP/ATS/SIS International Sepsis Definitions Conference. *Intensive Care Med* 2003; 29(4): 530-8.
3. Padkin A, Glodfrad C, Brady AR, et al. Epidemiology of severe sepsis occurring in the first 24 hours in intensive care units in England, Wales and Northern Ireland. *Crit Care Med* 2003; 31: 2332-8.
4. Edbrooke DL, Hibbert CL, Kingsley JM, et al. The patient related costs of care for sepsis patients in a UK adult general intensive care unit. *Crit Care Med* 1999; 27(9): 1760-7.
5. Talmor D, Greenberg D, Howell MD, et al. The costs and cost-effectiveness of an integrated sepsis treatment protocol. *Crit Care Med* 2008; 36(4): 1168-74.
6. Jones AE, Troyer JL, Kline JA. Cost effectiveness of an emergency department based early sepsis resuscitation protocol. *Crit Care Med* 2011; 39(6): 1306-12.
7. Suarez D, Ferrer R, Artigas A, et al. Cost-effectiveness of the Surviving Sepsis Campaign protocol for severe sepsis: a prospective nation-wide study in Spain. *Intensive Care Med* 2011; 37(3): 444-452.
8. Karlsson S, Varpula M, Ruokonen E, et al. Incidence, treatment and outcome of severe sepsis in ICU-treated adults in Finland: the Finnsepsis study. *Intensive Care Med* 2007; 33: 435-43.
9. Blanco J, Muriel-Bombin A, Sagredo V, et al. Incidence, organ dysfunction and mortality in severe sepsis: a Spanish multicentre study. *Critical Care* 2008; 12(6): R158.

- 1  
2  
3 10. Melamed A, Sorvillo FJ. The burden of sepsis-associated mortality in the  
4 United States from 1999 to 2005: an analysis of multiple-cause-of-death data.  
5 Critical Care 2009; 13(1): R28.  
6  
7
- 8  
9 11. Rooney C, Smith SK. Implementation of ICD-10 for mortality data in England  
10 and Wales from January 2001. Health Statistics Quarterly 2000; 8: 41-50.  
11  
12
- 13 12. Fuller JH, Elford J, Goldblatt P, et al. Diabetes mortality: new light on an  
14 underestimated public health problem." Diabetologia 1983; 24(5): 336-41.  
15  
16
- 17 13. Griffiths C, Lamagni T, Crowcroft NS, et al. Trends in MRSA in England and  
18 Wales: analysis of morbidity and mortality data for 1993-2002. Health  
19 Statistics Quarterly 2004; 21: 15-22.  
20  
21
- 22 14. Bruce M, Griffiths C, Brock A, et al. Trends in mortality and hospital  
23 admissions associated with epilepsy in England and Wales during the 1990s.  
24 Health Statistics Quarterly 2004; 21: 23-29.  
25  
26
- 27 15. Nath U, Thomson R, Wood R, et al. Population based mortality and quality of  
28 death certification in progressive supranuclear palsy (Steele-Richardson-  
29 Olszewski syndrome). J Neurol Neurosurg Psychiatry 2005; 76: 498-502.  
30  
31
- 32 16. Griffiths C, Rooney C. Trends in mortality from Alzheimer's Disease,  
33 Parkinson's disease and dementia in England and Wales 1979-2004. Health  
34 Statistics Quarterly 2006; 30: 6-14.  
35  
36
- 37 17. Thomas SL, Griffiths C, Smeeth L, et al. Burden of mortality associated with  
38 autoimmune diseases among females in the United Kingdom. Am J Public  
39 Health 2010; 100: 2279-87.  
40  
41
- 42 18. World Health Organisation. International Statistical Classification of Diseases  
43 and Related Health Problems, Tenth Revision, Volume 1, Tabular List. World  
44 Health Organization, 1992.  
45  
46  
47  
48  
49  
50  
51  
52  
53  
54  
55  
56  
57  
58  
59  
60

- 1  
2  
3 19. World Health Organisation. International Statistical Classification of Diseases  
4 and Related Health Problems, Tenth Revision, Volume 3, Alphabetical Index.  
5  
6 World Health Organization, 1992.  
7  
8
- 9 20. World Health Organization. ICD-10, 2007.  
10  
11 <http://apps.who.int/classifications/apps/icd/icd10online/>  
12
- 13 21. World Health Organisation. International Statistical Classification of Diseases  
14 and Related Health Problems, Tenth Revision, Volume 2, Instruction Manual.  
15  
16 World Health Organization, 1992.  
17  
18
- 19 22. Office for National Statistics. Mortality Statistics: Childhood Infant and  
20 Perinatal, Series DH3, No. 40. Office for National Statistics, 2009.  
21
- 22 23. Studnek JR, Artho MR, Garner CL, et al. The impact of emergency medical  
23 services on the ED care of severe sepsis. Am J of Emerg Med 2010; 30: 51-6.  
24  
25
- 26 24. Levy MM, Dellinger RP, Townsend SR, et al. The Surviving Sepsis Campaign:  
27 results of an international guideline-based performance improvement  
28 program targetting severe sepsis. Crit Care Med 2010; 38: 367-74.  
29  
30  
31  
32  
33  
34  
35  
36  
37  
38  
39  
40  
41  
42  
43  
44  
45  
46  
47  
48  
49  
50  
51  
52  
53  
54  
55  
56  
57  
58  
59  
60

1  
2  
3  
4  
5  
6  
7  
8  
9  
10  
11  
12  
13  
14  
15  
16  
17  
18  
19  
20  
21  
22  
23  
24  
25  
26  
27  
28  
29  
30  
31  
32  
33  
34  
35  
36  
37  
38  
39  
40  
41  
42  
43  
44  
45  
46  
47  
48  
49  
50  
51  
52  
53  
54  
55  
56  
57  
58  
59  
60

**Appendix**

ICD-10 codes that are definitely or maybe linked with sepsis.

For peer review only



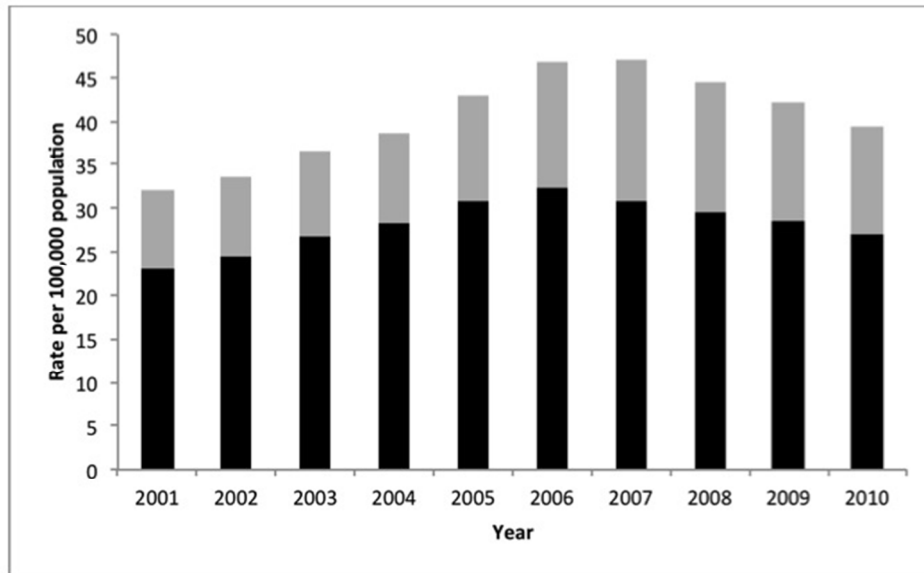

Figure 1. Directly age-standardised rates of death definitely, black, and maybe, grey, associated with sepsis, England 2001-10.

254x190mm (72 x 72 DPI)

1  
2  
3  
4  
5  
6  
7  
8  
9  
10  
11  
12  
13  
14  
15  
16  
17  
18  
19  
20  
21  
22  
23  
24  
25  
26  
27  
28  
29  
30  
31  
32  
33  
34  
35  
36  
37  
38  
39  
40  
41  
42  
43  
44  
45  
46  
47  
48  
49  
50  
51  
52  
53  
54  
55  
56  
57  
58  
59  
60

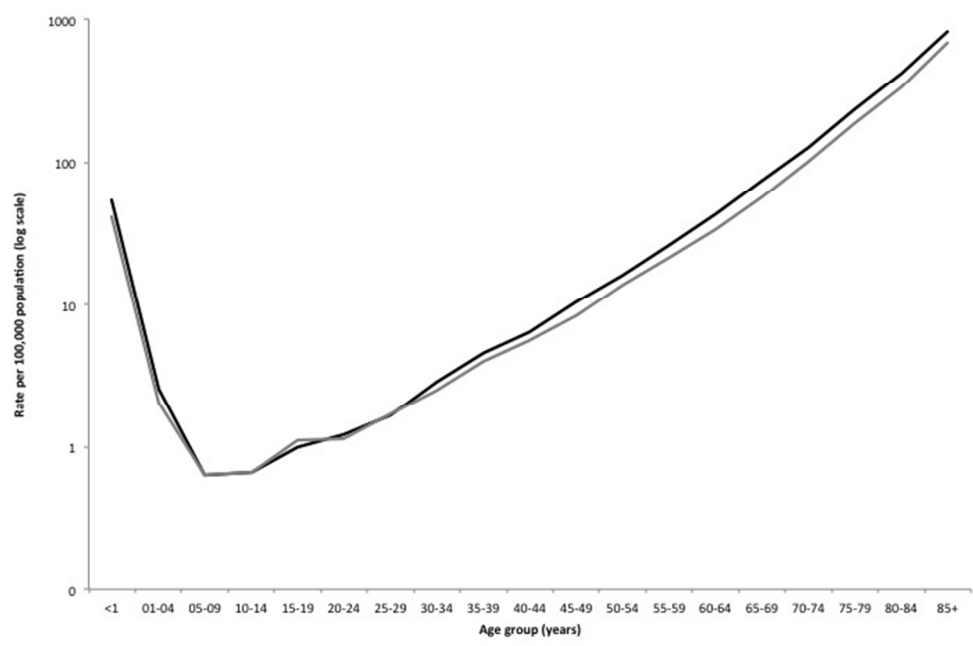

Figure 2. Age specific death rates for males, black, and females, grey, of deaths definitely associated with sepsis, England, 2001-10.  
254x190mm (72 x 72 DPI)

ew only

**Table 1**

| ICD-10 codes   | ICD-10 Chapter                                                | Sepsis deaths  | All deaths       | Percentage of sepsis associated deaths in chapter | Percentage of all deaths in chapter that are sepsis associated |
|----------------|---------------------------------------------------------------|----------------|------------------|---------------------------------------------------|----------------------------------------------------------------|
| A00-B99        | Infectious diseases                                           | 26,296         | 53,543           | 11.7                                              | 49.1                                                           |
| C00-D48        | Neoplasms                                                     | 30,210         | 1,307,155        | 13.4                                              | 2.3                                                            |
| D50-D89        | Diseases of the blood                                         | 1,696          | 9,610            | 0.8                                               | 17.6                                                           |
| E00-E90        | Endocrine diseases                                            | 6,995          | 69,483           | 3.1                                               | 10.1                                                           |
| F00-F99        | Mental and behavioural disorders                              | 1,899          | 150,122          | 0.8                                               | 1.3                                                            |
| G00-G99        | Nervous system diseases                                       | 3,199          | 149,773          | 1.4                                               | 2.1                                                            |
| H00-H59        | Eye diseases                                                  | 40             | 112              | 0.0                                               | 35.7                                                           |
| H60-H95        | Ear diseases                                                  | 53             | 206              | 0.0                                               | 25.7                                                           |
| I00-I99        | Circulatory diseases                                          | 25,803         | 1,708,766        | 11.5                                              | 1.5                                                            |
| J00-J99        | Respiratory diseases                                          | 34,581         | 654,960          | 15.4                                              | 5.3                                                            |
| K00-K93        | Digestive diseases                                            | 31,550         | 234,960          | 14.0                                              | 13.4                                                           |
| L00-L99        | Skin diseases                                                 | 12,251         | 16,190           | 5.5                                               | 75.7                                                           |
| M00-M99        | Musculoskeletal diseases                                      | 5,215          | 41,617           | 2.3                                               | 12.5                                                           |
| N00-N99        | Genitourinary diseases                                        | 40,090         | 96,988           | 17.8                                              | 41.3                                                           |
| O00-O99        | Pregnancy                                                     | 41             | 429              | 0.0                                               | 9.6                                                            |
| P00-P96        | Perinatal period                                              | 372            | 1,958            | 0.2                                               | 19.0                                                           |
| Q00-Q99        | Congenital abnormalities                                      | 568            | 11,545           | 0.3                                               | 4.9                                                            |
| R00-R99        | Symptoms, signs and abnormal clinical and laboratory findings | 17             | 109,542          | 0.0                                               | 0.0                                                            |
| V01-Y98, U50.9 | External causes                                               | 3,849          | 162,139          | 1.7                                               | 2.4                                                            |
| <b>Total</b>   |                                                               | <b>224,725</b> | <b>4,800,260</b> | <b>100.0</b>                                      | <b>4.7</b>                                                     |

1  
2  
3  
4  
5  
6  
7  
8  
9  
10  
11  
12  
13  
14  
15  
16  
17  
18  
19  
20  
21  
22  
23  
24  
25  
26  
27  
28  
29  
30  
31  
32  
33  
34  
35  
36  
37  
38  
39  
40  
41  
42  
43  
44  
45  
46  
47  
48  
49  
50  
51  
52  
53  
54  
55  
56  
57  
58  
59  
60

**Table 2**

| <b>Number of causes mentioned</b> | <b>All deaths (%)</b> | <b>Sepsis-associated deaths (%)</b> |
|-----------------------------------|-----------------------|-------------------------------------|
| <b>1</b>                          | 25.1                  | 1.1                                 |
| <b>2</b>                          | 35.1                  | 18.8                                |
| <b>3</b>                          | 21.9                  | 33.0                                |
| <b>4</b>                          | 10.6                  | 23.9                                |
| <b>5</b>                          | 4.4                   | 12.8                                |
| <b>6</b>                          | 1.7                   | 6.0                                 |
| <b>7 or more</b>                  | 1.1                   | 4.4                                 |

For peer review only

**Table 3**

|                                    | Number of deaths | Percentage of all sepsis associated deaths |
|------------------------------------|------------------|--------------------------------------------|
| Cancer                             | 37,727           | 16.8                                       |
| Diabetes                           | 21,086           | 9.4                                        |
| Congestive Heart Failure           | 9,957            | 4.4                                        |
| Chronic renal failure              | 12,611           | 5.6                                        |
| Chronic Lower Respiratory Diseases | 13,666           | 6.1                                        |
| Hypertension                       | 9,375            | 4.2                                        |
| Chronic liver disease              | 6,033            | 2.7                                        |
| HIV                                | 298              | 0.1                                        |
| Chronic alcohol abuse              | 3,719            | 1.7                                        |

**Table 4**

| <b>Place of death</b>        | <b>Sepsis associated deaths (number [percent])</b> | <b>All deaths (number [percent])</b> | <b>Sepsis associated deaths (% of all deaths in location)</b> |
|------------------------------|----------------------------------------------------|--------------------------------------|---------------------------------------------------------------|
| Care Home                    | 10,165 [4.5]                                       | 865,755 [18.0]                       | 1.2                                                           |
| Elsewhere                    | 315 [0.1]                                          | 96,632 [2.0]                         | 0.3                                                           |
| Home                         | 3,495 [1.5]                                        | 915,919 [19.1]                       | 0.4                                                           |
| Hospice                      | 609 [0.3]                                          | 232,899 [4.9]                        | 0.3                                                           |
| Hospital                     | 211,695 [93.4]                                     | 2,669,925 [55.6]                     | 7.9                                                           |
| Other Communal Establishment | 268 [0.1]                                          | 19,131 [0.4]                         | 1.4                                                           |
| <b>Total</b>                 | <b>226,547 [100]</b>                               | <b>4,800,261 [100]</b>               | <b>4.7</b>                                                    |

## Appendix

| Association with sepsis | ICD-10 Chapter                                                      | ICD-10 codes                                                                                                                                                                   |
|-------------------------|---------------------------------------------------------------------|--------------------------------------------------------------------------------------------------------------------------------------------------------------------------------|
| <b>Definite</b>         | Infectious and parasitic diseases                                   | A02.1, A20.2, A20.7, A21.7, A22.7, A26.7, A32.7, A39.2, A39.4, A40, A41, A42.7, A48.4, B00.7, B37.7                                                                            |
|                         | Pregnancy, childbirth and the puerperium                            | O85                                                                                                                                                                            |
|                         | Conditions originating in the perinatal period                      | P36, P37.2                                                                                                                                                                     |
|                         | Symptoms, signs and abnormal clinical and laboratory findings       | R57.8                                                                                                                                                                          |
| <b>Maybe</b>            | Infectious and parasitic diseases                                   | A02.9, A03.9, A04, A20.3, A21.9, A22.8, A22.9, A23.8, A23.9, A24.1, A24.4, A28.2, A28.8, A28.9, A31.0, A32.9, A33, A39.0, A39.1, A39.3, A39.9, A48.0, A49, A54.8, B20.1, B20.7 |
|                         | Diseases of the eye and adnexa                                      | H44.0                                                                                                                                                                          |
|                         | Diseases of the respiratory system                                  | J80, J95.0                                                                                                                                                                     |
|                         | Diseases of the musculoskeletal system                              | M72.9                                                                                                                                                                          |
|                         | Diseases of the genitourinary system                                | N39.0                                                                                                                                                                          |
|                         | Pregnancy, childbirth and the puerperium                            | O08.0, O08.2, O75.3, O86, O88.3                                                                                                                                                |
|                         | Conditions originating in the perinatal period                      | P22.0                                                                                                                                                                          |
|                         | Symptoms, signs and abnormal clinical and laboratory findings       | R02, R50.8, R50.9, R57.9                                                                                                                                                       |
|                         | Injury, poisoning and certain other consequences of external causes | T80.2, T81.4, T82.6, T82.7, T83.5, T83.6, T84.5, T84.6, T84.7, T85.7, T88.0                                                                                                    |
|                         | Additional codes used by WHO for new and emerging conditions        | U04                                                                                                                                                                            |

**STROBE 2007 (v4) checklist of items to be included in reports of observational studies in epidemiology\***  
**Checklist for cohort, case-control, and cross-sectional studies (combined)**

| Section/Topic             | Item # | Recommendation                                                                                                                                                                                                                                                                                                                                                                                                                                                         | Reported on page # |
|---------------------------|--------|------------------------------------------------------------------------------------------------------------------------------------------------------------------------------------------------------------------------------------------------------------------------------------------------------------------------------------------------------------------------------------------------------------------------------------------------------------------------|--------------------|
| Title and abstract        | 1      | (a) Indicate the study’s design with a commonly used term in the title or the abstract                                                                                                                                                                                                                                                                                                                                                                                 | 1                  |
|                           |        | (b) Provide in the abstract an informative and balanced summary of what was done and what was found                                                                                                                                                                                                                                                                                                                                                                    | 2                  |
| <b>Introduction</b>       |        |                                                                                                                                                                                                                                                                                                                                                                                                                                                                        |                    |
| Background/rationale      | 2      | Explain the scientific background and rationale for the investigation being reported                                                                                                                                                                                                                                                                                                                                                                                   | 5                  |
| Objectives                | 3      | State specific objectives, including any pre-specified hypotheses                                                                                                                                                                                                                                                                                                                                                                                                      | 6                  |
| <b>Methods</b>            |        |                                                                                                                                                                                                                                                                                                                                                                                                                                                                        |                    |
| Study design              | 4      | Present key elements of study design early in the paper                                                                                                                                                                                                                                                                                                                                                                                                                | 7                  |
| Setting                   | 5      | Describe the setting, locations, and relevant dates, including periods of recruitment, exposure, follow-up, and data collection                                                                                                                                                                                                                                                                                                                                        | 7                  |
| Participants              | 6      | (a) <i>Cohort study</i> —Give the eligibility criteria, and the sources and methods of selection of participants. Describe methods of follow-up<br><i>Case-control study</i> —Give the eligibility criteria, and the sources and methods of case ascertainment and control selection. Give the rationale for the choice of cases and controls<br><i>Cross-sectional study</i> —Give the eligibility criteria, and the sources and methods of selection of participants | 7                  |
|                           |        | (b) <i>Cohort study</i> —For matched studies, give matching criteria and number of exposed and unexposed<br><i>Case-control study</i> —For matched studies, give matching criteria and the number of controls per case                                                                                                                                                                                                                                                 | N/A                |
| Variables                 | 7      | Clearly define all outcomes, exposures, predictors, potential confounders, and effect modifiers. Give diagnostic criteria, if applicable                                                                                                                                                                                                                                                                                                                               | 7                  |
| Data sources/ measurement | 8*     | For each variable of interest, give sources of data and details of methods of assessment (measurement). Describe comparability of assessment methods if there is more than one group                                                                                                                                                                                                                                                                                   | 7                  |
| Bias                      | 9      | Describe any efforts to address potential sources of bias                                                                                                                                                                                                                                                                                                                                                                                                              | N/A                |
| Study size                | 10     | Explain how the study size was arrived at                                                                                                                                                                                                                                                                                                                                                                                                                              | 7                  |
| Quantitative variables    | 11     | Explain how quantitative variables were handled in the analyses. If applicable, describe which groupings were chosen and why                                                                                                                                                                                                                                                                                                                                           | 7                  |
| Statistical methods       | 12     | (a) Describe all statistical methods, including those used to control for confounding                                                                                                                                                                                                                                                                                                                                                                                  | 7                  |
|                           |        | (b) Describe any methods used to examine subgroups and interactions                                                                                                                                                                                                                                                                                                                                                                                                    | N/A                |
|                           |        | (c) Explain how missing data were addressed                                                                                                                                                                                                                                                                                                                                                                                                                            | N/A                |
|                           |        | (d) <i>Cohort study</i> —If applicable, explain how loss to follow-up was addressed<br><i>Case-control study</i> —If applicable, explain how matching of cases and controls was addressed                                                                                                                                                                                                                                                                              | N/A                |



|                          |     |                                                                                                                                                                                                              |       |
|--------------------------|-----|--------------------------------------------------------------------------------------------------------------------------------------------------------------------------------------------------------------|-------|
|                          |     | <i>Cross-sectional study</i> —If applicable, describe analytical methods taking account of sampling strategy                                                                                                 |       |
|                          |     | (e) Describe any sensitivity analyses                                                                                                                                                                        | N/A   |
| <b>Results</b>           |     |                                                                                                                                                                                                              |       |
| Participants             | 13* | (a) Report numbers of individuals at each stage of study—eg numbers potentially eligible, examined for eligibility, confirmed eligible, included in the study, completing follow-up, and analysed            | 9     |
|                          |     | (b) Give reasons for non-participation at each stage                                                                                                                                                         | N/A   |
|                          |     | (c) Consider use of a flow diagram                                                                                                                                                                           |       |
| Descriptive data         | 14* | (a) Give characteristics of study participants (eg demographic, clinical, social) and information on exposures and potential confounders                                                                     | 9-11  |
|                          |     | (b) Indicate number of participants with missing data for each variable of interest                                                                                                                          | N/A   |
|                          |     | (c) <i>Cohort study</i> —Summarise follow-up time (eg, average and total amount)                                                                                                                             | N/A   |
| Outcome data             | 15* | <i>Cohort study</i> —Report numbers of outcome events or summary measures over time                                                                                                                          | N/A   |
|                          |     | <i>Case-control study</i> —Report numbers in each exposure category, or summary measures of exposure                                                                                                         | N/A   |
|                          |     | <i>Cross-sectional study</i> —Report numbers of outcome events or summary measures                                                                                                                           | N/A   |
| Main results             | 16  | (a) Give unadjusted estimates and, if applicable, confounder-adjusted estimates and their precision (eg, 95% confidence interval). Make clear which confounders were adjusted for and why they were included | 9     |
|                          |     | (b) Report category boundaries when continuous variables were categorized                                                                                                                                    | 9-11  |
|                          |     | (c) If relevant, consider translating estimates of relative risk into absolute risk for a meaningful time period                                                                                             | N/A   |
| Other analyses           | 17  | Report other analyses done—eg analyses of subgroups and interactions, and sensitivity analyses                                                                                                               | N/A   |
| <b>Discussion</b>        |     |                                                                                                                                                                                                              |       |
| Key results              | 18  | Summarise key results with reference to study objectives                                                                                                                                                     | 12    |
| Limitations              | 19  | Discuss limitations of the study, taking into account sources of potential bias or imprecision. Discuss both direction and magnitude of any potential bias                                                   | 12    |
| Interpretation           | 20  | Give a cautious overall interpretation of results considering objectives, limitations, multiplicity of analyses, results from similar studies, and other relevant evidence                                   | 13    |
| Generalisability         | 21  | Discuss the generalisability (external validity) of the study results                                                                                                                                        | 13-14 |
| <b>Other information</b> |     |                                                                                                                                                                                                              |       |
| Funding                  | 22  | Give the source of funding and the role of the funders for the present study and, if applicable, for the original study on which the present article is based                                                | 17    |

\*Give information separately for cases and controls in case-control studies and, if applicable, for exposed and unexposed groups in cohort and cross-sectional studies.

**Note:** An Explanation and Elaboration article discusses each checklist item and gives methodological background and published examples of transparent reporting. The STROBE checklist is best used in conjunction with this article (freely available on the Web sites of PLoS Medicine at <http://www.plosmedicine.org/>, Annals of Internal Medicine at <http://www.annals.org/>, and Epidemiology at <http://www.epidem.com/>). Information on the STROBE Initiative is available at [www.strobe-statement.org](http://www.strobe-statement.org).

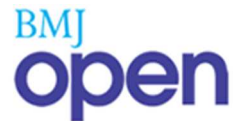

**Sepsis-associated mortality in England: an analysis of multiple cause of death data from 2001 to 2010.**

|                                 |                                                                                                                                                                                                                                                                                                                                                                                                                                                                                         |
|---------------------------------|-----------------------------------------------------------------------------------------------------------------------------------------------------------------------------------------------------------------------------------------------------------------------------------------------------------------------------------------------------------------------------------------------------------------------------------------------------------------------------------------|
| Journal:                        | <i>BMJ Open</i>                                                                                                                                                                                                                                                                                                                                                                                                                                                                         |
| Manuscript ID:                  | bmjopen-2013-002586.R1                                                                                                                                                                                                                                                                                                                                                                                                                                                                  |
| Article Type:                   | Research                                                                                                                                                                                                                                                                                                                                                                                                                                                                                |
| Date Submitted by the Author:   | 23-May-2013                                                                                                                                                                                                                                                                                                                                                                                                                                                                             |
| Complete List of Authors:       | McPherson, Duncan; Portsmouth Hospitals NHS Trust, Anaesthesia; Imperial College London, Institute of Global Health Innovation<br>Griffiths, Clare; London Health Observatory,<br>Williams, Matthew; Portsmouth Hospitals NHS Trust, Critical Care Medicine<br>Baker, Allan; London Health Observatory,<br>Klodawski, Ed; London Health Observatory,<br>Jacobson, Bobbie; London Health Observatory,<br>Donaldson, Liam; Imperial College London, Institute of Global Health Innovation |
| <b>Primary Subject Heading</b>: | Public health                                                                                                                                                                                                                                                                                                                                                                                                                                                                           |
| Secondary Subject Heading:      | Research methods, Intensive care, Infectious diseases, Health policy, Epidemiology                                                                                                                                                                                                                                                                                                                                                                                                      |
| Keywords:                       | STATISTICS & RESEARCH METHODS, EPIDEMIOLOGY, Health policy < HEALTH SERVICES ADMINISTRATION & MANAGEMENT, Public health < INFECTIOUS DISEASES, Adult intensive & critical care < INTENSIVE & CRITICAL CARE, PUBLIC HEALTH                                                                                                                                                                                                                                                               |
|                                 |                                                                                                                                                                                                                                                                                                                                                                                                                                                                                         |

SCHOLARONE™  
Manuscripts

1  
2  
3  
4  
5  
6  
7  
8  
9  
10  
11  
12  
13  
14  
15  
16  
17  
18  
19  
20  
21  
22  
23  
24  
25  
26  
27  
28  
29  
30  
31  
32

## ***Sepsis-associated mortality in England: an analysis of multiple cause of death data from 2001 to 2010***

Duncan McPherson, postgraduate student,<sup>1,3</sup> Clare Griffiths, programme manager,<sup>2</sup> Matthew Williams, consultant in critical care medicine,<sup>3</sup> Allan Baker, senior public health information analyst,<sup>2</sup> Ed Klodawski, public health information analyst,<sup>2</sup> Bobbie Jacobson, director<sup>2</sup>, Liam Donaldson, chair in health policy<sup>1</sup>

1. Imperial College London, 10th Floor QEQM building, St Mary's Hospital, Praed Street, London, W2 1NY
2. London Health Observatory, Stephenson House, 75 Hampstead Road, London NW1 2PL
3. Portsmouth Hospitals NHS Trust, Southwick Hill Road, Cosham, Portsmouth, PO6 3LY

33  
34  
35  
36  
37  
38  
39  
40  
41  
42  
43  
44  
45  
46  
47  
48  
49  
50  
51  
52  
53  
54  
55  
56  
57  
58  
59  
60

Correspondence to: Dr Duncan McPherson, Department of Anaesthesia, Portsmouth Hospitals NHS Trust, Southwick Hill Road, Cosham, Portsmouth, PO6 3LY.

[duncan.mcpherson@nhs.net](mailto:duncan.mcpherson@nhs.net).

Contents: 2 figures, 4 tables, 1 appendix.

## **Abstract**

### **Objectives**

To quantify mortality associated with sepsis in the whole population of England.

### **Design**

Descriptive statistics of multiple cause of death data.

### **Setting**

England between 2001 and 2010.

### **Participants**

All people whose death was registered in England between 2001 and 2010 and whose certificate contained a sepsis associated International Classification of Diseases, Tenth Revision (ICD-10) code.

### **Data sources**

Multiple cause of death data extracted from Office for National Statistics mortality database.

### **Statistical methods**

Age and sex specific death rates and directly age standardised death rates.

### **Results**

In 2010, 5.1% of deaths in England were definitely associated with sepsis. Adding those that may be associated with sepsis increases this figure to 7.7% of all deaths. Only 8.6% of deaths definitely associated with sepsis in 2010 had a sepsis related condition as the underlying cause of death. 99% of deaths definitely associated with sepsis have one of three ICD-10 codes, A40, A41 and P36, in at least one position on the death

1  
2  
3 certificate. 7% of deaths definitely associated with sepsis in 2001-10 did not occur in  
4  
5 hospital.  
6  
7

### 8 **Conclusions**

9  
10 Sepsis is a major public health problem in England. In attempting to tackle the  
11  
12 problem of sepsis it is not sufficient to rely on hospital based statistics, or methods of  
13  
14 intervention, alone. A robust estimate of the burden of sepsis associated mortality in  
15  
16 England can be made by identifying deaths with one of three ICD-10 codes in multiple  
17  
18 cause of death data. These three codes could be used for future monitoring of the  
19  
20 burden of sepsis-associated mortality.  
21  
22  
23  
24  
25  
26  
27  
28  
29  
30  
31  
32  
33  
34  
35  
36  
37  
38  
39  
40  
41  
42  
43  
44  
45  
46  
47  
48  
49  
50  
51  
52  
53  
54  
55  
56  
57  
58  
59  
60

## Summary

### Article Focus

- A large proportion of patients admitted to critical care units with sepsis die and if sepsis is identified and treated earlier, mortality can be reduced producing cost-effective benefits in terms of life years/quality-adjusted life years gained;
- Assessing sepsis-associated mortality is not straightforward as there are no codes for sepsis in ICD-10 and sepsis-related conditions are often not selected as the underlying cause of death;
- Multiple cause of death data are now available for deaths in the UK and provide a way of determining those that are associated with sepsis.

### Key Messages

- In 2001-10, one in twenty deaths in England was associated with sepsis based on information recorded on death certificates;
- 99% of deaths definitely associated with sepsis include one of three ICD-10 codes, A40, A41 and P36, somewhere on the list of causes of death;
- These deaths occur across a wide range of specialty areas and 15,000 (7%) deaths definitely associated with sepsis in 2001-10 did not occur in hospital; this should prompt a much wider population-based approach to future quality improvement.

### Strengths and Limitations

- Multiple Cause of Death data are collected for all deaths, allowing us to count all those whose death is associated with sepsis, not just those who die in hospital, or those for whom septicaemia is the underlying cause;
- Our population estimates are based on the 2001 UK census, which will shortly be updated by the 2011 Census;

1  
2  
3  
4  
5  
6  
7  
8  
9  
10  
11  
12  
13  
14  
15  
16  
17  
18  
19  
20  
21  
22  
23  
24  
25  
26  
27  
28  
29  
30  
31  
32  
33  
34  
35  
36  
37  
38  
39  
40  
41  
42  
43  
44  
45  
46  
47  
48  
49  
50  
51  
52  
53  
54  
55  
56  
57  
58  
59  
60

- The study relies on the accuracy of coding. There is no specific code for sepsis within ICD-10, which may lead to misclassification of causes. We may have underestimated the true impact of sepsis.

For peer review only

## Introduction

Sepsis is defined as systemic inflammatory response syndrome caused by infection.<sup>1</sup>  
<sup>2</sup> Severe sepsis is sepsis with organ system dysfunction, while septic shock is defined as sepsis with hypotension refractory to fluid resuscitation, leading to inadequate tissue perfusion. These entities lie on a spectrum of diseases culminating with death caused by multiple organ dysfunction.

Twenty seven per cent of intensive care admissions in England and Wales are for severe sepsis and almost half of these patients die in hospital.<sup>3</sup> In 1995-96, in an adult general intensive care unit (ICU) in a UK university hospital, the median cost of treating a patient with sepsis was six times the cost of treating a patient without sepsis. The mortality rate was also significantly higher for the sepsis patients, despite the increased spending, at 53% compared with 29% for non-sepsis patients.<sup>4</sup> More recent studies have found that using integrated sepsis treatment protocols, including those developed by the International Surviving Sepsis Campaign, can be effective at reducing mortality rates.<sup>5-7</sup> Such protocols may increase costs through lengthier ICU stays, but appear cost-effective in terms of life years and quality-adjusted life years gained. Estimates of the incidence of sepsis, and associated mortality, are hard to obtain. Recent estimates suggest that the incidence of severe sepsis in the general population is 38 per 100,000 in Finland<sup>8</sup> and 25 per 100,000 in Spain<sup>9</sup>, while older studies have found rates as high as 240-300 per 100,000 population in the USA.<sup>10, 11</sup> However, these estimates are based on administrative in-patient data. It is likely that these underestimate the incidence of sepsis as they only count those admitted to hospital. Using multiple cause of death (MCO) data it has been estimated that 6% of all deaths in the USA are associated with sepsis.<sup>12</sup>

In 1993, the redevelopment of the Office for National Statistics (ONS) mortality database allowed all the diseases and conditions mentioned on the death certificate to



1  
2  
3 be coded and stored. Up to 15 mentioned causes of death can be coded, in addition to  
4 the underlying and secondary causes of death.<sup>13</sup> MCODE data have been used in England  
5 to examine the contribution to mortality of many different diseases and conditions.<sup>14-19</sup>  
6  
7 Analysis of mortality by cause of death usually uses the underlying cause of death, which  
8 is the “disease or injury which initiated the train of morbid events leading directly to  
9 death or the circumstances of the accident or violence which produced the fatal  
10 injury.”<sup>20</sup> For many patients, sepsis may be part of that causal sequence, but it would not  
11 be listed as the underlying cause of death. For example, in cases where sepsis is  
12 hospital-acquired, the original reason for hospitalisation would generally be the  
13 underlying cause of death. Consequently, examining mortality from sepsis using the  
14 underlying cause of death would not identify those deaths as being sepsis-associated.  
15  
16  
17  
18  
19  
20  
21  
22  
23  
24  
25  
26

27 In this paper MCODE data have been used to estimate the number of deaths in  
28 England associated with sepsis.  
29  
30  
31  
32  
33  
34  
35  
36  
37  
38  
39  
40  
41  
42  
43  
44  
45  
46  
47  
48  
49  
50  
51  
52  
53  
54  
55  
56  
57  
58  
59  
60

## Methods

Mortality data were obtained from the Office for National Statistics (ONS) mortality database, for the period from 2001 to 2010. As sepsis deaths cannot be directly identified in ICD-10, a list of codes related to sepsis was selected. Using the underlying question, "If this condition appears on the death certificate, what is the chance this person would have had sepsis?" a list of conditions was derived. These were then divided into two categories: those definitely meaning sepsis was involved and those that may mean sepsis was involved. The ICD-10 codes associated with these conditions were identified using the ICD-10 index<sup>21</sup> and online searching tool developed by WHO and the German Institute of Medical Documentation and Information<sup>22</sup>. The first three authors then reviewed the list of codes, by asking the question "If this code was recorded on a death certificate, what is the probability that the deceased had severe sepsis?" If the probability was considered to be more than 50% then the code was included in a candidate list. This candidate list of codes was crosschecked with the Melamed paper<sup>12</sup> and the ICD "List of conditions unlikely to cause death"<sup>23</sup> to ensure that no unlikely codes were included and that no likely codes had been overlooked. The ICD-10 codes that are definitely or maybe associated with sepsis are listed in the Appendix.

Deaths were extracted from the mortality database if they had a mention of any of the identified codes anywhere on the death certificate. Age- and sex-specific rates were calculated using mid-year population estimates for England, published in June 2010, as denominators for the relevant year and, where appropriate, death rates were directly age-standardised using the European Standard Population.

To look at patterns of sepsis-associated mortality, we also examined the underlying cause of death for these deaths, other co-morbidities mentioned on the certificate, and the total number of contributing causes mentioned on the death certificate. We compared these with overall patterns for all deaths in England. We also examined

1  
2  
3 sepsis-associated mortality by place of death: home, hospital, care home etc. We  
4  
5 restricted these analyses to those deaths definitely considered to be sepsis-associated.  
6  
7 Deaths under 28 days have a separate death certificate and only mentioned causes are  
8  
9 coded for these deaths - an underlying cause of death cannot be selected from them.<sup>24</sup>  
10  
11 These deaths were included in the majority of analyses in this study and where they  
12  
13 have been excluded this has been noted in the results.  
14  
15  
16  
17  
18  
19  
20  
21  
22  
23  
24  
25  
26  
27  
28  
29  
30  
31  
32  
33  
34  
35  
36  
37  
38  
39  
40  
41  
42  
43  
44  
45  
46  
47  
48  
49  
50  
51  
52  
53  
54  
55  
56  
57  
58  
59  
60

## Results

Between 2001 and 2010 there were 226,547 deaths that were definitely directly associated with sepsis in England, 4.7% of all deaths. Adding those that may be related to sepsis increased this to 332,757, 6.9% of all deaths. In 2010 alone, 5.1% of deaths were definitely associated with sepsis, and adding in those deaths that may be related increased that percentage to 7.7%. Figure 1 shows mortality rates for deaths that are definitely and maybe linked to sepsis for each year. For both sexes combined, the rate rose to a peak in 2007 and then declined. Excluding the 'maybe' group brings the peak in mortality forward to 2006. The number of deaths definitely associated with sepsis was also highest in 2006. The number rose from 16,800 in 2001 to a peak of 26,150 in 2006, before decreasing every year to 23,700 in 2010. The remaining analyses in this paper present results only for those deaths definitely associated with sepsis.

In 2010, the percentage of deaths associated with sepsis was higher for females (5.5%) than males (4.8%). However, when directly age-standardised rates were calculated (which take into account differences in the age structures of the population between the sexes) the rate in 2010 was higher for males (29.8 deaths per 100,000 population) than females (24.8 per 100,000). Between 2001 and 2010, the annual death rate for males was 20-28 per cent higher than the rate for females.

Age-specific mortality rates were higher in the very youngest and elderly, with the rate in the under 1s being similar to the rate among those in their 60s (figure 2). At younger ages, the rate declined rapidly after age 1. In 2001-10, the age-specific mortality rate for deaths associated with sepsis in ages 5-14 was less than 1 per 100,000 population for both males and females. Rates then rose with age, with particularly marked increases in the oldest age groups. For both males and females, the rate in the 85+ age group was double the rate for those aged 80-84. The age-specific rate for males was significantly higher than females for deaths under age one and for every age group

1  
2  
3 from age 40 onwards. For deaths at age 85 and over, the age-specific rate for men was  
4  
5 822 deaths per 100,000 population, compared to 683 per 100,000 for women.  
6  
7

8 Table 1 shows the underlying cause of death for deaths that are definitely sepsis-  
9 associated, by chapter of the ICD, and the percentage of each ICD chapter that is sepsis-  
10 associated. This does not attempt to identify the cause of sepsis for these deaths, but  
11 associated. This does not attempt to identify the cause of sepsis for these deaths, but  
12 merely identifies the disease or injury that initiated the train of morbid events leading  
13 directly to death. The underlying causes for deaths with a mention of sepsis are spread  
14 across a wide spectrum of ICD chapters. The ICD chapter that accounts for the biggest  
15 percentage of sepsis-associated deaths is genitourinary diseases (17.8%). The leading  
16 causes of death also account for high percentages, such as respiratory diseases (15.4%),  
17 digestive diseases (14.0%), cancer (13.4%) and circulatory diseases (11.5%), while  
18 11.7% of deaths have an underlying cause in the infectious diseases chapter. Almost half  
19 of deaths with an underlying cause of infectious disease are associated with sepsis  
20 (49.1%). There are wide differences in the percentages in other chapters. Only 1.5% of  
21 circulatory disease deaths are associated with sepsis, but for deaths with an underlying  
22 cause of skin disease, three-quarters are associated with sepsis (75.7%). Twenty per  
23 cent of deaths from diseases originating in the perinatal period also had a sepsis-  
24 associated cause of death on the death certificate. However, it must be borne in mind  
25 that deaths under 28 days were not included in the analysis of deaths by underlying  
26 cause as a different death certificate is used to register these deaths in England (Office  
27 for National Statistics 2009).<sup>24</sup>  
28  
29  
30  
31  
32  
33  
34  
35  
36  
37  
38  
39  
40  
41  
42  
43  
44  
45  
46  
47

48 We also examined the percentage of sepsis-associated deaths where sepsis was also  
49 the underlying cause of death. For deaths definitely considered to be sepsis-associated,  
50 this was 8.6% in 2010. Of the cases definitely associated with sepsis, 99% contained one  
51 of three ICD-10 codes in at least one position on the death certificate: A40 (streptococcal  
52 septicaemia), A41 (other septicaemia) and P36 (bacterial sepsis of newborn).  
53  
54  
55  
56  
57  
58  
59  
60

1  
2  
3 Table 2 shows the total number of causes mentioned on the death certificate for all  
4 deaths and for sepsis-associated deaths. Sepsis-associated deaths tend to have more  
5 conditions mentioned than do all deaths. For all deaths, two is the most common  
6  
7 number of causes mentioned, whereas for sepsis-associated deaths the most common  
8  
9 number is three. Very few sepsis-associated deaths have only one cause of death on the  
10  
11 death certificate. This is because 'sepsis' alone is not sufficient detail to allow the death  
12  
13 to be registered without reference to a coroner – the certificate must mention the cause  
14  
15 of the sepsis for this to be acceptable under law. However, it also seems that overall,  
16  
17 sepsis-associated deaths have proportionally more conditions mentioned, as might be  
18  
19 expected given the severity of illness amongst these individuals. For sepsis-associated  
20  
21 deaths, 23.2% have five or more conditions mentioned, compared with 7.2% of all  
22  
23 deaths. Neonatal deaths were excluded from this part of the analysis, because the  
24  
25 conditions mentioned on their death certificates include conditions in the mother and in  
26  
27 the baby, so they are not directly comparable to those deaths where the deceased was  
28  
29 aged 28 days or older.  
30  
31  
32  
33  
34

35 Many of the chronic conditions known to be associated with sepsis appear on the  
36  
37 death certificates of sepsis-associated deaths – 16.8% of certificates mentioned cancer,  
38  
39 and 9.4% diabetes (table 3).  
40  
41

42 Table 4 shows that 93.4% of all sepsis-associated deaths took place in hospital,  
43  
44 compared with 55.6% of all deaths. Nearly 7% of sepsis-associated deaths therefore did  
45  
46 not take place in hospital. Less than 2% of sepsis-associated deaths occurred in the  
47  
48 deceased's own home, compared with nearly 20% of all deaths. Almost 8% of deaths in  
49  
50 hospital were associated with sepsis, compared to less than half a percent of deaths that  
51  
52 took place in the deceased's own home, hospices, or elsewhere.  
53  
54  
55  
56  
57  
58  
59  
60

## Discussion

Using the information recorded on death certificates for the whole population, we have estimated that at least one in twenty of all deaths in England are associated with sepsis. The sepsis-associated death rate has been increasing over the last decade, reaching a peak in 2006. The rate has decreased in more recent years, but not yet to the level in the earlier part of the decade. This was an observational study but now that this trend in sepsis-related deaths has been identified, it would be a worthwhile research exercise to investigate further why rates have changed over time. We have shown that 6.6% of patients with definite severe sepsis die outside of a hospital, indicating that in 2001-10 up to 15,000 deaths associated with sepsis may have been missed if we had only counted deaths in hospital. Sepsis-associated deaths appear to have larger numbers of conditions on their death certificates than do all deaths.

Our study does have some limitations. In using multiple cause of death data, it relies on the accuracy of the recording of causes of death on the death certificate. As a study of sepsis-associated deaths in the US has noted, codes for septicaemia have to be used as a proxy for sepsis in ICD-10. There is a risk that this may lead to misclassification of deaths, and possibly an under-estimation of the burden of sepsis-related mortality.<sup>12</sup> We should also note that our mortality rates were calculated using mid-year population estimates which are based on the 2001 Census. In December 2012, ONS plan to release revised mid-year estimates for England, which will take into account the results of the 2011 Census.

Our estimate of deaths associated with sepsis is similar to that found in the USA using a similar method.<sup>12</sup> Many current estimates of mortality due to sepsis look at patients admitted to hospital and who subsequently die, giving an indication of case fatality. It is estimated that the mortality of patients admitted to critical care units and diagnosed with severe sepsis is 47%.<sup>3</sup> Our study is population-based and therefore gives

1  
2  
3 an indication of the burden of sepsis across the whole population. Most analyses of  
4  
5 cause of death data only look at the underlying cause, which identifies the disease or  
6  
7 injury that initiated the events leading to death. We have shown, however, that less than  
8  
9 10% of deaths associated with sepsis have it as the underlying cause. To fully account  
10  
11 for sepsis-related mortality, it is therefore necessary to examine all the recorded causes  
12  
13 of death, as we have done. Although this analysis is more complex than just examining  
14  
15 the underlying cause of death, we have shown that just three ICD-10 codes – A40, A41  
16  
17 and P36 – identify 99% of deaths definitely associated with sepsis. These three codes  
18  
19 alone could therefore be used for future monitoring and audit of the burden and quality  
20  
21 of sepsis care using multiple cause of death data. However, regular review of the ICD-10  
22  
23 codes definitely or possibly associated with sepsis (and the number of deaths with these  
24  
25 codes) would be worthwhile as ICD codes are updated. For example, a code for  
26  
27 necrotising fasciitis, M72.6, was added by the WHO as an update to ICD-10, but not  
28  
29 implemented for coding by ONS until 2011. As the presence of this code on a death  
30  
31 certificate may indicate sepsis, this could be considered in future analyses, but counting  
32  
33 deaths with one of just the three identified ICD-10 codes would still find the vast  
34  
35 majority of sepsis-associated mortality.  
36  
37  
38

39 Sepsis can no longer be regarded as a niche problem relevant only to the critical care  
40  
41 units that treat the most severely affected patients. There is some evidence that  
42  
43 recognition of sepsis may be low outside hospitals. For example, patients diagnosed  
44  
45 with severe sepsis in one US emergency department were reviewed.<sup>25</sup> Only half of these  
46  
47 patients had been transported to hospital by ambulance. In this half of cases, the  
48  
49 paramedic had explicitly considered sepsis in only a fifth. For those patients where  
50  
51 paramedics had recognised sepsis, there was a significant decrease in time taken to  
52  
53 receive antibiotic treatment. By the time patients with sepsis are admitted to critical  
54  
55 care, they are very severely unwell and therefore likely to die despite the best efforts of  
56  
57 their healthcare team. There is also evidence that treating patients with sepsis earlier  
58  
59  
60



1  
2  
3 and in a more coordinated manner reduces mortality.<sup>26</sup> Therefore, if we could find ways  
4  
5 to encourage earlier diagnosis and earlier, coordinated treatment, it is probable that the  
6  
7 overall mortality from sepsis could be reduced. The reduction of sepsis related mortality  
8  
9 since 2007 may represent the results of the introduction of changes to identify such  
10  
11 patients, e.g. Early Warning Scoring (EWS) systems, Critical Care Outreach, efforts to  
12  
13 improve awareness and training (e.g. Surviving Sepsis Campaign). However, we contend  
14  
15 there is clearly room for further improvements. There is growing consensus that the  
16  
17 clinical treatment of severely ill patients is best done initially in a general way, avoiding  
18  
19 over emphasis on identifying the exact cause of sepsis. The most important element of  
20  
21 the treatment of sepsis is to recognise that severe illness is present early and rapidly  
22  
23 institute appropriate treatment (with targeted but broad spectrum antibiotics and  
24  
25 source control) and resuscitation that aims to correct the physiological abnormalities  
26  
27 associated with sepsis, whatever the underlying cause. Resuscitation efforts are generic,  
28  
29 as many elements of the sepsis syndrome are common whatever the causal pathogen,  
30  
31 but are important as part of the “bundle of care” if mortality is to be lowered.  
32  
33  
34

35  
36 Despite the potential for underestimation, this study has demonstrated that sepsis is  
37  
38 associated with 1 in 20 deaths and therefore provides further evidence that sepsis is a  
39  
40 major public health problem in England as well as elsewhere in the world. While there is  
41  
42 no perfect solution to the question of how levels of sepsis-related mortality should be  
43  
44 estimated, we hope that this result, and this method of using multiple cause of death  
45  
46 data, will form the basis of future accounting of the burden of sepsis among the whole  
47  
48 population of England. These results could also support audit of the quality of sepsis  
49  
50 diagnosis and treatment across the whole healthcare system. Estimating sepsis-  
51  
52 associated mortality from multiple cause of death data (rather than estimates based on  
53  
54 hospital patients) would also allow more detailed analyses to be undertaken, such as  
55  
56 investigating geographic or socio-economic inequalities in these deaths. This would be a  
57  
58 profitable area for future research. It also allows a more nuanced debate to take place,  
59  
60

1  
2  
3 which should now involve policy makers, public health services, primary and emergency  
4 care providers as well as critical care specialists. Ultimately, having this more detailed  
5 picture should enable improved quality of care and more cost-effective use of resources  
6  
7  
8  
9 with respect to preventing, identifying and treating sepsis.  
10  
11  
12  
13  
14  
15  
16  
17  
18  
19  
20  
21  
22  
23  
24  
25  
26  
27  
28  
29  
30  
31  
32  
33  
34  
35  
36  
37  
38  
39  
40  
41  
42  
43  
44  
45  
46  
47  
48  
49  
50  
51  
52  
53  
54  
55  
56  
57  
58  
59  
60

**Figures**

Figure 1. Directly age-standardised rates of death definitely, dark grey, and maybe, light grey, associated with sepsis, England 2001-10, with 95% confidence interval for the rate.

Figure 2. Age specific death rates for males, dark grey, and females, light grey, of deaths definitely associated with sepsis, England, 2001-10, with 95% confidence interval for the rate.

**Tables**

Table 1. Deaths that are definitely associated with sepsis, by underlying cause of death and comparison with all deaths, occurring in England 2001-10 excluding neonatal deaths.

Table 2. Percentage of deaths with given number of diseases or conditions mentioned on the death certificate in deaths definitely associated with sepsis, excluding neonatal deaths, compared with all deaths in England 2001-10.

Table 3. Co-morbidities mentioned on the death certificates of deaths definitely associated with sepsis, excluding neonatal deaths, in England 2001-10.

Table 4: Deaths definitely associated with sepsis, excluding neonatal deaths, compared with all deaths by place of death in England 2001-10.

## **Footnotes**

## **Copyright**

The Corresponding Author has the right to grant on behalf of all authors and does grant on behalf of all authors, an exclusive licence (or non exclusive for government employees) on a worldwide basis to the BMJ Publishing Group Ltd to permit this article (if accepted) to be published in BMJ editions and any other BMJ PGL products and sublicences such use and exploit all subsidiary rights, as set out in our licence.

## **Contributors**

DMcP, CG and MW compiled the list of ICD-10 codes to be searched. AB and EK extracted and tabulated the mortality data and calculated death rates. All authors made substantial contributions to conception and design, acquisition of data, or analysis and interpretation of data. All authors took part in drafting the article or revising it critically for important intellectual content and gave final approval of the version to be published. DMcP is the guarantor.

## **Funding**

The departments of the authors funded this study.

## **Competing interests**

All authors have completed the Unified Competing Interest form at [www.icmje.org/coi\\_disclosure.pdf](http://www.icmje.org/coi_disclosure.pdf) (available on request from the corresponding author) and declare: no support from any organisation for the submitted work; no financial relationships with any organisations that might have an interest in the submitted work in the previous 3 years; no other relationships or activities that could appear to have influenced the submitted work.

## **Ethical Approval**

1  
2  
3 Ethical approval was not required for this study.  
4  
5

6  
7 **Data Sharing**

8 No additional data available. The London Health Observatory holds individual  
9 mortality data but these records cannot be shared under the terms of the data access  
10 agreement with the Office for National Statistics who provide the data.  
11  
12  
13  
14  
15  
16  
17  
18  
19  
20  
21  
22  
23  
24  
25  
26  
27  
28  
29  
30  
31  
32  
33  
34  
35  
36  
37  
38  
39  
40  
41  
42  
43  
44  
45  
46  
47  
48  
49  
50  
51  
52  
53  
54  
55  
56  
57  
58  
59  
60

## References

1. The ACCP/SCCM consensus conference committee. Definitions for sepsis and organ failure and guidelines for the use on innovative therapies in sepsis. *Chest* 1992; 101(6): 1481-3.
2. Levy MM, Fink MP, Marshall JC, et al. SCCM/ESICM/ACCP/ATS/SIS International Sepsis Definitions Conference. *Intensive Care Med* 2003; 29(4): 530-8.
3. Padkin A, Glodfrad C, Brady AR, et al. Epidemiology of severe sepsis occurring in the first 24 hours in intensive care units in England, Wales and Northern Ireland. *Crit Care Med* 2003; 31: 2332-8.
4. Edbrooke DL, Hibbert CL, Kingsley JM, et al. The patient related costs of care for sepsis patients in a UK adult general intensive care unit. *Crit Care Med* 1999; 27(9): 1760-7.
5. Talmor D, Greenberg D, Howell MD, et al. The costs and cost-effectiveness of an integrated sepsis treatment protocol. *Crit Care Med* 2008; 36(4): 1168-74.
6. Jones AE, Troyer JL, Kline JA. Cost effectiveness of an emergency department based early sepsis resuscitation protocol. *Crit Care Med* 2011; 39(6): 1306-12.
7. Suarez D, Ferrer R, Artigas A, et al. Cost-effectiveness of the Surviving Sepsis Campaign protocol for severe sepsis: a prospective nation-wide study in Spain. *Intensive Care Med* 2011; 37(3): 444-452.
8. Karlsson S, Varpula M, Ruokonen E, et al. Incidence, treatment and outcome of severe sepsis in ICU-treated adults in Finland: the Finnsepsis study. *Intensive Care Med* 2007; 33: 435-43.
9. Blanco J, Muriel-Bombin A, Sagredo V, et al. Incidence, organ dysfunction and mortality in severe sepsis: a Spanish multicentre study. *Critical Care* 2008; 12(6): R158.

10. Martin GS, Mannino DM, Eaton S, et al. The Epidemiology of Sepsis in the United States from 1979 through 2000. *New Engl J Med* 2003; 348: 1546-54.
11. Angus DC, Linde-Zwirble WT, Lidicker J, et al. Epidemiology of severe sepsis in the United States: Analysis of incidence, outcome, and associated costs of care. *Crit Care Med* 2001; 29(7): 1303-10.
12. Melamed A, Sorvillo FJ. The burden of sepsis-associated mortality in the United States from 1999 to 2005: an analysis of multiple-cause-of-death data. *Critical Care* 2009; 13(1): R28.
13. Rooney C, Smith SK. Implementation of ICD-10 for mortality data in England and Wales from January 2001. *Health Statistics Quarterly* 2000; 8: 41-50.
14. Fuller JH, Elford J, Goldblatt P, et al. Diabetes mortality: new light on an underestimated public health problem." *Diabetologia* 1983; 24(5): 336-41.
15. Griffiths C, Lamagni T, Crowcroft NS, et al. Trends in MRSA in England and Wales: analysis of morbidity and mortality data for 1993-2002. *Health Statistics Quarterly* 2004; 21: 15-22.
16. Bruce M, Griffiths C, Brock A, et al. Trends in mortality and hospital admissions associated with epilepsy in England and Wales during the 1990s. *Health Statistics Quarterly* 2004; 21: 23-29.
17. Nath U, Thomson R, Wood R, et al. Population based mortality and quality of death certification in progressive supranuclear palsy (Steele-Richardson-Olszewski syndrome). *J Neurol Neurosurg Psychiatry* 2005; 76: 498-502.
18. Griffiths C, Rooney C. Trends in mortality from Alzheimer's Disease, Parkinson's disease and dementia in England and Wales 1979-2004. *Health Statistics Quarterly* 2006; 30: 6-14.
19. Thomas SL, Griffiths C, Smeeth L, et al. Burden of mortality associated with autoimmune diseases among females in the United Kingdom. *Am J Public Health* 2010; 100: 2279-87.



- 1
  - 2
  - 3
  - 4
  - 5
  - 6
  - 7
  - 8
  - 9
  - 10
  - 11
  - 12
  - 13
  - 14
  - 15
  - 16
  - 17
  - 18
  - 19
  - 20
  - 21
  - 22
  - 23
  - 24
  - 25
  - 26
  - 27
  - 28
  - 29
  - 30
  - 31
  - 32
  - 33
  - 34
  - 35
  - 36
  - 37
  - 38
  - 39
  - 40
  - 41
  - 42
  - 43
  - 44
  - 45
  - 46
  - 47
  - 48
  - 49
  - 50
  - 51
  - 52
  - 53
  - 54
  - 55
  - 56
  - 57
  - 58
  - 59
  - 60
20. World Health Organisation. International Statistical Classification of Diseases and Related Health Problems, Tenth Revision, Volume 1, Tabular List. World Health Organization, 1992.
21. World Health Organisation. International Statistical Classification of Diseases and Related Health Problems, Tenth Revision, Volume 3, Alphabetical Index. World Health Organization, 1992.
22. World Health Organization. ICD-10, 2007.  
<http://apps.who.int/classifications/apps/icd/icd10online/>
23. World Health Organisation. International Statistical Classification of Diseases and Related Health Problems, Tenth Revision, Volume 2, Instruction Manual. World Health Organization, 1992.
24. Office for National Statistics. Mortality Statistics: Childhood Infant and Perinatal, Series DH3, No. 40. Office for National Statistics, 2009.
25. Studnek JR, Artho MR, Garner CL, et al. The impact of emergency medical services on the ED care of severe sepsis. *Am J of Emerg Med* 2010; 30: 51-6.
26. Levy MM, Dellinger RP, Townsend SR, et al. The Surviving Sepsis Campaign: results of an international guideline-based performance improvement program targetting severe sepsis. *Crit Care Med* 2010; 38: 367-74.

**Appendix**

ICD-10 codes that are definitely or maybe linked with sepsis.

For peer review only

**Table 1**

| ICD-10 codes   | ICD-10 Chapter                                                | Sepsis deaths  | All deaths       | Percentage of sepsis associated deaths in chapter | Percentage of all deaths in chapter that are sepsis associated |
|----------------|---------------------------------------------------------------|----------------|------------------|---------------------------------------------------|----------------------------------------------------------------|
| A00-B99        | Infectious diseases                                           | 26,296         | 53,543           | 11.7                                              | 49.1                                                           |
| C00-D48        | Neoplasms                                                     | 30,210         | 1,307,155        | 13.4                                              | 2.3                                                            |
| D50-D89        | Diseases of the blood                                         | 1,696          | 9,610            | 0.8                                               | 17.6                                                           |
| E00-E90        | Endocrine diseases                                            | 6,995          | 69,483           | 3.1                                               | 10.1                                                           |
| F00-F99        | Mental and behavioural disorders                              | 1,899          | 150,122          | 0.8                                               | 1.3                                                            |
| G00-G99        | Nervous system diseases                                       | 3,199          | 149,773          | 1.4                                               | 2.1                                                            |
| H00-H59        | Eye diseases                                                  | 40             | 112              | 0.0                                               | 35.7                                                           |
| H60-H95        | Ear diseases                                                  | 53             | 206              | 0.0                                               | 25.7                                                           |
| I00-I99        | Circulatory diseases                                          | 25,803         | 1,708,766        | 11.5                                              | 1.5                                                            |
| J00-J99        | Respiratory diseases                                          | 34,581         | 654,960          | 15.4                                              | 5.3                                                            |
| K00-K93        | Digestive diseases                                            | 31,550         | 234,960          | 14.0                                              | 13.4                                                           |
| L00-L99        | Skin diseases                                                 | 12,251         | 16,190           | 5.5                                               | 75.7                                                           |
| M00-M99        | Musculoskeletal diseases                                      | 5,215          | 41,617           | 2.3                                               | 12.5                                                           |
| N00-N99        | Genitourinary diseases                                        | 40,090         | 96,988           | 17.8                                              | 41.3                                                           |
| O00-O99        | Pregnancy                                                     | 41             | 429              | 0.0                                               | 9.6                                                            |
| P00-P96        | Perinatal period                                              | 372            | 1,958            | 0.2                                               | 19.0                                                           |
| Q00-Q99        | Congenital abnormalities                                      | 568            | 11,545           | 0.3                                               | 4.9                                                            |
| R00-R99        | Symptoms, signs and abnormal clinical and laboratory findings | 17             | 109,542          | 0.0                                               | 0.0                                                            |
| V01-Y98, U50.9 | External causes                                               | 3,849          | 162,139          | 1.7                                               | 2.4                                                            |
| <b>Total</b>   |                                                               | <b>224,725</b> | <b>4,800,260</b> | <b>100.0</b>                                      | <b>4.7</b>                                                     |

**Table 2**

| <b>Number of causes mentioned</b> | <b>All deaths (%)</b> | <b>Sepsis-associated deaths (%)</b> |
|-----------------------------------|-----------------------|-------------------------------------|
| <b>1</b>                          | 25.1                  | 1.1                                 |
| <b>2</b>                          | 35.1                  | 18.8                                |
| <b>3</b>                          | 21.9                  | 33.0                                |
| <b>4</b>                          | 10.6                  | 23.9                                |
| <b>5</b>                          | 4.4                   | 12.8                                |
| <b>6</b>                          | 1.7                   | 6.0                                 |
| <b>7 or more</b>                  | 1.1                   | 4.4                                 |

**Table 3**

|                                    | <b>Number of deaths</b> | <b>Percentage of all sepsis associated deaths</b> |
|------------------------------------|-------------------------|---------------------------------------------------|
| Cancer                             | 37,727                  | 16.8                                              |
| Diabetes                           | 21,086                  | 9.4                                               |
| Congestive Heart Failure           | 9,957                   | 4.4                                               |
| Chronic renal failure              | 12,611                  | 5.6                                               |
| Chronic Lower Respiratory Diseases | 13,666                  | 6.1                                               |
| Hypertension                       | 9,375                   | 4.2                                               |
| Chronic liver disease              | 6,033                   | 2.7                                               |
| HIV                                | 298                     | 0.1                                               |
| Chronic alcohol abuse              | 3,719                   | 1.7                                               |

**Table 4**

| <b>Place of death</b>        | <b>Sepsis associated deaths (number [percent])</b> | <b>All deaths (number [percent])</b> | <b>Sepsis associated deaths (% of all deaths in location)</b> |
|------------------------------|----------------------------------------------------|--------------------------------------|---------------------------------------------------------------|
| Care Home                    | 10,165 [4.5]                                       | 865,755 [18.0]                       | 1.2                                                           |
| Elsewhere                    | 315 [0.1]                                          | 96,632 [2.0]                         | 0.3                                                           |
| Home                         | 3,495 [1.5]                                        | 915,919 [19.1]                       | 0.4                                                           |
| Hospice                      | 609 [0.3]                                          | 232,899 [4.9]                        | 0.3                                                           |
| Hospital                     | 211,695 [93.4]                                     | 2,669,925 [55.6]                     | 7.9                                                           |
| Other Communal Establishment | 268 [0.1]                                          | 19,131 [0.4]                         | 1.4                                                           |
| <b>Total</b>                 | <b>226,547 [100]</b>                               | <b>4,800,261 [100]</b>               | <b>4.7</b>                                                    |

1  
2  
3  
4  
5  
6  
7  
8  
9  
10  
11  
12  
13  
14  
15  
16  
17  
18  
19  
20  
21  
22  
23  
24  
25  
26  
27  
28  
29  
30  
31  
32

## ***Sepsis-associated mortality in England: an analysis of multiple cause of death data from 2001 to 2010***

Duncan McPherson, postgraduate student,<sup>1,3</sup> Clare Griffiths, programme manager,<sup>2</sup> Matthew Williams, consultant [in critical care medicine](#),<sup>3</sup> Allan Baker, senior public health information analyst,<sup>2</sup> Ed Klodawski, public health information analyst,<sup>2</sup> Bobbie Jacobson, director<sup>2</sup>, Liam Donaldson, chair in health policy<sup>1</sup>

1. Imperial College London, 10th Floor QEQM building, St Mary's Hospital, Praed Street, London, W2 1NY
2. London Health Observatory, Stephenson House, 75 Hampstead Road, London NW1 2PL
3. Portsmouth Hospitals NHS Trust, Southwick Hill Road, Cosham, Portsmouth, PO6 3LY

33 Correspondence to: Dr Duncan McPherson, Department of Anaesthesia, Portsmouth  
34 Hospitals NHS Trust, Southwick Hill Road, Cosham, Portsmouth, PO6 3LY.

35 [duncan.mcpherson@nhs.net](mailto:duncan.mcpherson@nhs.net).

36  
37  
38  
39  
40  
41  
42  
43  
44  
45  
46  
47  
48  
49  
50  
51  
52  
53  
54  
55  
56  
57  
58  
59  
60

Contents: 2 figures, 4 tables, 1 appendix.

**Abstract****Objectives**

To quantify mortality associated with sepsis in the whole population of England.

**Design**

Descriptive statistics of multiple cause of death data.

**Setting**

England between 2001 and 2010.

**Participants**

All people whose death was registered in England between 2001 and 2010 and whose certificate contained a sepsis associated International Classification of Diseases, Tenth Revision (ICD-10) code.

**Data sources**

Multiple cause of death data extracted from Office for National Statistics mortality database.

**Statistical methods**

Age and sex specific death rates and directly age standardised death rates.

**Results**

In 2010, 5.1% of deaths in England were definitely associated with sepsis. Adding those that may be associated with sepsis increases this figure to 7.7% of all deaths. Only 8.6% of deaths definitely associated with sepsis in 2010 had a sepsis related condition as the underlying cause of death. 99% of deaths definitely associated with sepsis have one of three ICD-10 codes, A40, A41 and P36, in at least one position on the death

1  
2  
3 certificate. 7% of deaths definitely associated with sepsis in 2001-10 did not occur in  
4  
5 hospital.  
6  
7

### 8 **Conclusions**

9  
10 Sepsis is a major public health problem in England. In attempting to tackle the  
11  
12 problem of sepsis it is not sufficient to rely on hospital based statistics, or methods of  
13  
14 intervention, alone. A robust estimate of the burden of sepsis associated mortality in  
15  
16 England can be made by identifying deaths with one of three ICD-10 codes in multiple  
17  
18 cause of death data. These three codes could be used for future monitoring of the  
19  
20 burden of sepsis-associated mortality.  
21  
22  
23  
24  
25  
26  
27  
28  
29  
30  
31  
32  
33  
34  
35  
36  
37  
38  
39  
40  
41  
42  
43  
44  
45  
46  
47  
48  
49  
50  
51  
52  
53  
54  
55  
56  
57  
58  
59  
60



## Summary

### Article Focus

- A large proportion of patients admitted to critical care units with sepsis die and if sepsis is identified and treated earlier, mortality can be reduced producing cost-effective benefits in terms of life years/quality-adjusted life years gained;
- Assessing sepsis-associated mortality is not straightforward as there are no codes for sepsis in ICD-10 and sepsis-related conditions are often not selected as the underlying cause of death;
- Multiple cause of death data are now available for deaths in the UK and provide a way of determining those that are associated with sepsis.

### Key Messages

- In 2001-10, one in twenty deaths in England was associated with sepsis [based on information recorded on death certificates](#);
- 99% of deaths definitely associated with sepsis include one of three ICD-10 codes, A40, A41 and P36, somewhere on the list of causes of death;
- These deaths occur across a wide range of specialty areas and 15,000 (7%) deaths definitely associated with sepsis in 2001-10 did not occur in hospital; this should prompt a much wider population-based approach to future quality improvement.

### Strengths and Limitations

- Multiple Cause of Death data are collected for all deaths, allowing us to count all those whose death is associated with sepsis, not just those who die in hospital, or those for whom septicaemia is the underlying cause;
- Our population estimates are based on the 2001 UK census, which will shortly be updated by the 2011 Census;

- 1
  - 2
  - 3
  - 4
  - 5
  - 6
  - 7
  - 8
  - 9
  - 10
  - 11
  - 12
  - 13
  - 14
  - 15
  - 16
  - 17
  - 18
  - 19
  - 20
  - 21
  - 22
  - 23
  - 24
  - 25
  - 26
  - 27
  - 28
  - 29
  - 30
  - 31
  - 32
  - 33
  - 34
  - 35
  - 36
  - 37
  - 38
  - 39
  - 40
  - 41
  - 42
  - 43
  - 44
  - 45
  - 46
  - 47
  - 48
  - 49
  - 50
  - 51
  - 52
  - 53
  - 54
  - 55
  - 56
  - 57
  - 58
  - 59
  - 60
- The study relies on the accuracy of coding. There is no specific code for sepsis within ICD-10, which may lead to misclassification of causes. We may have underestimated the true impact of sepsis.

For peer review only

## Introduction

Sepsis is defined as systemic inflammatory response syndrome caused by infection.<sup>1</sup>  
<sup>2</sup> Severe sepsis is sepsis with organ system dysfunction, while septic shock is defined as sepsis with hypotension refractory to fluid resuscitation, leading to inadequate tissue perfusion. These entities lie on a spectrum of diseases culminating with death caused by multiple organ dysfunction.

Twenty seven per cent of intensive care admissions in England and Wales are for severe sepsis and almost half of these patients die in hospital.<sup>3</sup> In 1995-96, in an adult general intensive care unit (ICU) in a UK university hospital, the median cost of treating a patient with sepsis was six times the cost of treating a patient without sepsis. The mortality rate was also significantly higher for the sepsis patients, despite the increased spending, at 53% compared with 29% for non-sepsis patients.<sup>4</sup> More recent studies have found that using integrated sepsis treatment protocols, including those developed by the International Surviving Sepsis Campaign, can be effective at reducing mortality rates.<sup>5-7</sup> Such protocols may increase costs through lengthier ICU stays, but appear cost-effective in terms of life years and quality-adjusted life years gained. Estimates of the incidence of sepsis, and associated mortality, are hard to obtain. Recent estimates suggest that the incidence of severe sepsis in the general population is 38 per 100,000 in Finland<sup>8</sup> and 25 per 100,000 in Spain<sup>9</sup>, while older studies have found rates as high as 240-300 per 100,000 population in the USA.<sup>10, 11</sup> However, these estimates are based on administrative in-patient data. It is likely that these underestimate the incidence of sepsis as they only count those admitted to hospital. Using multiple cause of death (MCO) data it has been estimated that 6% of all deaths in the USA are associated with sepsis.<sup>12,10</sup>

In 1993, the redevelopment of the Office for National Statistics (ONS) mortality database allowed all the diseases and conditions mentioned on the death certificate to

1  
2  
3 be coded and stored. Up to 15 mentioned causes of death can be coded, in addition to  
4  
5 the underlying and secondary causes of death.<sup>13-14</sup> MCODE data have been used in England  
6  
7 to examine the contribution to mortality of many different diseases and conditions.<sup>14-19</sup>  
8  
9 <sup>12-17</sup>-Analysis of mortality by cause of death usually uses the underlying cause of death,  
10  
11 which is the “disease or injury which initiated the train of morbid events leading directly  
12  
13 to death or the circumstances of the accident or violence which produced the fatal  
14  
15 injury.”<sup>20-18</sup> For many patients, sepsis may be part of that causal sequence, but it would  
16  
17 not be listed as the underlying cause of death. For example, in cases where sepsis is  
18  
19 hospital-acquired, the original reason for hospitalisation would generally be the  
20  
21 underlying cause of death. Consequently, examining mortality from sepsis using the  
22  
23 underlying cause of death would not identify those deaths as being sepsis-associated.  
24  
25

26  
27 In this paper MCODE data have been used to estimate the number of deaths in  
28  
29 England associated with sepsis.  
30  
31  
32  
33  
34  
35  
36  
37  
38  
39  
40  
41  
42  
43  
44  
45  
46  
47  
48  
49  
50  
51  
52  
53  
54  
55  
56  
57  
58  
59  
60

## Methods

Mortality data were obtained from the Office for National Statistics (ONS) mortality database, for the period from 2001 to 2010. As sepsis deaths cannot be directly identified in ICD-10, a list of codes related to sepsis was selected. Using the underlying question, "If this condition appears on the death certificate, what is the chance this person would have had sepsis?" a list of conditions was derived. These were then divided into two categories: those definitely meaning sepsis was involved and those that may mean sepsis was involved. The ICD-10 codes associated with these conditions were identified using the ICD-10 index<sup>2149</sup> and online searching tool developed by WHO and the German Institute of Medical Documentation and Information<sup>2220</sup>. The first three authors then reviewed the list of codes, by asking the question "If this code was recorded on a death certificate, what is the probability that the deceased had severe sepsis?" If the probability was considered to be more than 50% then the code was included in a candidate list. This candidate list of codes was crosschecked with the Melamed paper<sup>1240</sup> and the ICD "List of conditions unlikely to cause death"<sup>2324</sup> to ensure that no unlikely codes were included and that no likely codes had been overlooked. The ICD-10 codes that are definitely or maybe associated with sepsis are listed in the Appendix.

Deaths were extracted from the mortality database if they had a mention of any of the identified codes anywhere on the death certificate. Age- and sex-specific rates were calculated using mid-year population estimates for England, published in June 2010, as denominators for the relevant year and, where appropriate, death rates were directly age-standardised using the European Standard Population.

To look at patterns of sepsis-associated mortality, we also examined the underlying cause of death for these deaths, other co-morbidities mentioned on the certificate, and the total number of contributing causes mentioned on the death certificate. We

1  
2  
3 compared these with overall patterns for all deaths in England. We also examined  
4  
5 sepsis-associated mortality by place of death: home, hospital, care home etc. We  
6  
7 restricted these analyses to those deaths definitely considered to be sepsis-associated.  
8  
9 Deaths under 28 days have a separate death certificate and only mentioned causes are  
10  
11 coded for these deaths - an underlying cause of death cannot be selected from them.<sup>2422</sup>  
12  
13 These deaths were included in the majority of analyses in this study and where they  
14  
15 have been excluded this has been noted in the results.  
16  
17  
18  
19  
20  
21  
22  
23  
24  
25  
26  
27  
28  
29  
30  
31  
32  
33  
34  
35  
36  
37  
38  
39  
40  
41  
42  
43  
44  
45  
46  
47  
48  
49  
50  
51  
52  
53  
54  
55  
56  
57  
58  
59  
60

## Results

Between 2001 and 2010 there were 226,547 deaths that were definitely directly associated with sepsis in England, 4.7% of all deaths. Adding those that may be related to sepsis increased this to 332,757, 6.9% of all deaths. In 2010 alone, 5.1% of deaths were definitely associated with sepsis, and adding in those deaths that may be related increased that percentage to 7.7%. Figure 1 shows mortality rates for deaths that are definitely and maybe linked to sepsis for each year. For both sexes combined, the rate rose to a peak in 2007 and then declined. Excluding the 'maybe' group brings the peak in mortality forward to 2006. The number of deaths definitely associated with sepsis was also highest in 2006. The number rose from 16,800 in 2001 to a peak of 26,150 in 2006, before decreasing every year to 23,700 in 2010. The remaining analyses in this paper present results only for those deaths definitely associated with sepsis.

In 2010, the percentage of deaths associated with sepsis was higher for females (5.5%) than males (4.8%). However, when directly age-standardised rates were calculated (which take into account differences in the age structures of the population between the sexes) the rate in 2010 was higher for males (29.8 deaths per 100,000 population) than females (24.8 per 100,000). Between 2001 and 2010, the annual death rate for males was 20-28 per cent higher than the rate for females.

Age-specific mortality rates were higher in the very youngest and elderly, with the rate in the under 1s being similar to the rate among those in their 60s (figure 2). At younger ages, the rate declined rapidly after age 1. In 2001-10, the age-specific mortality rate for deaths associated with sepsis in ages 5-14 was less than 1 per 100,000 population for both males and females. Rates then rose with age, with particularly marked increases in the oldest age groups. For both males and females, the rate in the 85+ age group was double the rate for those aged 80-84. The age-specific rate for males was **significantly** higher than females for deaths under age **one5** and for every age group

1  
2  
3 from age ~~4030~~ onwards. For deaths at age 85 and over, the age-specific rate for men was  
4  
5 822 deaths per 100,000 population, compared to 683 per 100,000 for women.  
6  
7

8 Table 1 shows the underlying cause of death for deaths that are definitely sepsis-  
9 associated, by chapter of the ICD, and the percentage of each ICD chapter that is sepsis-  
10 associated. This does not attempt to identify the cause of sepsis for these deaths, but  
11 merely identifies the disease or injury that initiated the train of morbid events leading  
12 directly to death. The underlying causes for dDeaths with a mention of sepsis are spread  
13 across a wide spectrum of ICD chapters. The ICD chapter that accounts for the biggest  
14 percentage of sepsis-associated deaths is genitourinary diseases (17.8%). The leading  
15 causes of death also account for high percentages, such as respiratory diseases (15.4%),  
16 digestive diseases (14.0%), cancer (13.4%) and circulatory diseases (11.5%), while  
17 11.7% of deaths have an underlying cause in the infectious diseases chapter. Almost half  
18 of deaths with an underlying cause of infectious disease are associated with sepsis  
19 (49.1%). There are wide differences in the percentages in other chapters. Only 1.5% of  
20 circulatory disease deaths are associated with sepsis, but for deaths with an underlying  
21 cause of skin disease, three-quarters are associated with sepsis (75.7%). Twenty per  
22 cent of deaths from diseases originating in the perinatal period also had a sepsis-  
23 associated cause of death on the death certificate. However, it must be borne in mind  
24 that deaths under 28 days were not included in the analysis of deaths by underlying  
25 cause as a different death certificate is used to register these deaths in England (Office  
26 for National Statistics 2009).<sup>2422</sup>  
27  
28  
29  
30  
31  
32  
33  
34  
35  
36  
37  
38  
39  
40  
41  
42  
43  
44  
45  
46  
47

48 We also examined the percentage of sepsis-associated deaths where sepsis was also  
49 the underlying cause of death. For deaths definitely considered to be sepsis-associated,  
50 this was 8.6% in 2010. Of the cases definitely associated with sepsis, 99% contained one  
51 of three ICD-10 codes in at least one position on the death certificate: A40 (streptococcal  
52 septicaemia), A41 (other septicaemia) and P36 (bacterial sepsis of newborn).  
53  
54  
55  
56  
57  
58  
59  
60



1  
2  
3 Table 2 shows the total number of causes mentioned on the death certificate for all  
4 deaths and for sepsis-associated deaths. Sepsis-associated deaths tend to have more  
5 conditions mentioned than do all deaths. For all deaths, two is the most common  
6  
7  
8  
9  
10  
11  
12  
13  
14  
15  
16  
17  
18  
19  
20  
21  
22  
23  
24  
25  
26  
27  
28  
29  
30  
31  
32  
33  
34  
35  
36  
37  
38  
39  
40  
41  
42  
43  
44  
45  
46  
47  
48  
49  
50  
51  
52  
53  
54  
55  
56  
57  
58  
59  
60

Table 2 shows the total number of causes mentioned on the death certificate for all deaths and for sepsis-associated deaths. Sepsis-associated deaths tend to have more conditions mentioned than do all deaths. For all deaths, two is the most common number of causes mentioned, whereas for sepsis-associated deaths the most common number is three. Very few sepsis-associated deaths have only one cause of death on the death certificate. This is because 'sepsis' alone is not sufficient detail to allow the death to be registered without reference to a coroner – the certificate must mention the cause of the sepsis for this to be acceptable under law. However, it also seems that overall, sepsis-associated deaths have proportionally more conditions mentioned, as might be expected given the severity of illness amongst these individuals. For sepsis-associated deaths, 23.2% have five or more conditions mentioned, compared with 7.2% of all deaths. Neonatal deaths were excluded from this part of the analysis, because the conditions mentioned on their death certificates include conditions in the mother and in the baby, so they are not directly comparable to those deaths where the deceased was aged 28 days or older.

Many of the chronic conditions known to be associated with sepsis appear on the death certificates of sepsis-associated deaths – 16.8% of certificates mentioned cancer, and 9.4% diabetes (table 3).

Table 4 shows that 93.4% of all sepsis-associated deaths took place in hospital, compared with 55.6% of all deaths. Nearly 7% of sepsis-associated deaths therefore did not take place in hospital. Less than 2% of sepsis-associated deaths occurred in the deceased's own home, compared with nearly 20% of all deaths. Almost 8% of deaths in hospital were associated with sepsis, compared to less than half a percent of deaths that took place in the deceased's own home, hospices, or elsewhere.

## Discussion

Using the information recorded on death certificates for the whole population,  
weWe have estimated that at least one in twenty of all deaths in England are associated with sepsis. The sepsis-associated death rate has been increasing over the last decade, reaching a peak in 2006. The rate has decreased in more recent years, but not yet to the level in the earlier part of the decade. This was an observational study but now that this trend in sepsis-related deaths has been identified, it would be a worthwhile research exercise to investigate further why rates have changed over time. We have shown that 6.6% of patients with definite severe sepsis die outside of a hospital, indicating that in 2001-10 up to 15,000 deaths associated with sepsis may have been missed if we had only counted deaths in hospital. Sepsis-associated deaths appear to have larger numbers of conditions on their death certificates than do all deaths.

Our study does have some limitations. In using multiple cause of death data, it relies on the accuracy of the recording of causes of death on the death certificate. As a study of sepsis-associated deaths in the US has noted, codes for septicaemia have to be used as a proxy for sepsis in ICD-10. There is a risk that this may lead to misclassification of deaths, and possibly an under-estimation of the burden of sepsis-related mortality.<sup>12+0</sup> We should also note that our mortality rates were calculated using mid-year population estimates which are based on the 2001 Census. In December 2012, ONS plan to release revised mid-year estimates for England, which will take into account the results of the 2011 Census.

Our estimate of deaths associated with sepsis is similar to that found in the USA using a similar method.<sup>12+0</sup> Many current estimates of mortality due to sepsis look at patients admitted to hospital and who subsequently die, giving an indication of case fatality. It is estimated that the mortality of patients admitted to critical care units and diagnosed with severe sepsis is 47%.<sup>3</sup> Our study is population-based and therefore gives

1  
2  
3 an indication of the burden of sepsis across the whole population. Most analyses of  
4 cause of death data only look at the underlying cause, which identifies the disease or  
5 injury that initiated the events leading to death. We have shown, however, that less than  
6 10% of deaths associated with sepsis have it as the underlying cause. To fully account  
7 for sepsis-related mortality, it is therefore necessary to examine all the recorded causes  
8 of death, as we have done. Although this analysis is more complex than just examining  
9 the underlying cause of death, we have shown that just three ICD-10 codes – A40, A41  
10 and P36 – identify 99% of deaths definitely associated with sepsis. These three codes  
11 alone could therefore be used for future monitoring and audit of the burden and quality  
12 of sepsis care using multiple cause of death data. However, regular review of the ICD-10  
13 codes definitely or possibly associated with sepsis (and the number of deaths with these  
14 codes) would be worthwhile as ICD codes are updated. For example, a code for  
15 necrotising fasciitis, M72.6, was added by the WHO as an update to ICD-10, but not  
16 implemented for coding by ONS until 2011. As the presence of this code on a death  
17 certificate may indicate sepsis, this could be considered in future analyses, but counting  
18 deaths with one of just the three identified ICD-10 codes would still find the vast  
19 majority of sepsis-associated mortality.  
20  
21  
22  
23  
24  
25  
26  
27  
28  
29  
30  
31  
32  
33  
34  
35  
36  
37  
38

39 Sepsis can no longer be regarded as a niche problem relevant only to the critical care  
40 units that treat the most severely affected patients. There is some evidence that  
41 recognition of sepsis may be low outside hospitals. For example, patients diagnosed  
42 with severe sepsis in one US emergency department were reviewed.<sup>2523</sup> Only half of  
43 these patients had been transported to hospital by ambulance. In this half of cases, the  
44 paramedic had explicitly considered sepsis in only a fifth. For those patients where  
45 paramedics had recognised sepsis, there was a significant decrease in time taken to  
46 receive antibiotic treatment. By the time patients with sepsis are admitted to critical  
47 care, they are very severely unwell and therefore likely to die despite the best efforts of  
48 their healthcare team. There is also evidence that treating patients with sepsis earlier  
49  
50  
51  
52  
53  
54  
55  
56  
57  
58  
59  
60

1  
2  
3 and in a more coordinated manner reduces mortality.<sup>26,24</sup> Therefore, if we could find  
4 ways to encourage earlier diagnosis and earlier, coordinated treatment, it is probable  
5 that the overall mortality from sepsis could be reduced. The reduction of sepsis related  
6 mortality since 2007 may represent the results of the introduction of changes to identify  
7 such patients, e.g. Early Warning Scoring (EWS) systems, Critical Care Outreach, efforts  
8 to improve awareness and training (e.g. Surviving Sepsis Campaign). However, we  
9 contend there is clearly room for further improvements. There is growing consensus  
10 that the clinical treatment of severely ill patients is best done initially in a general way,  
11 avoiding over emphasis on identifying the exact cause of sepsis. The most important  
12 element of the treatment of sepsis is to recognise that severe illness is present early and  
13 rapidly institute appropriate treatment (with targeted but broad spectrum antibiotics  
14 and source control) and resuscitation that aims to correct the physiological  
15 abnormalities associated with sepsis, whatever the underlying cause. Resuscitation  
16 efforts are generic, as many elements of the sepsis syndrome are common whatever the  
17 causal pathogen, but are important as part of the “bundle of care” if mortality is to be  
18 lowered.

19  
20  
21  
22  
23  
24  
25  
26  
27  
28  
29  
30  
31  
32  
33  
34  
35  
36  
37 Despite the potential for underestimation, this study has demonstrated that sepsis is  
38 associated with 1 in 20 deaths and therefore ~~This study~~ provides further evidence that  
39 sepsis is a major public health problem in England as well as elsewhere in the world.

40  
41  
42  
43 While there is no perfect solution to the question of how levels of sepsis-related  
44 mortality should be estimated, we We hope that this result, and this method of using  
45 multiple cause of death data, will form the basis of ~~a more accurate, and ongoing, future~~  
46 accounting of the burden of sepsis among the whole population of England. These  
47 results could also as well as a tool to support audit of the quality of sepsis diagnosis and  
48 treatment across the whole healthcare system. Estimating sepsis-associated mortality  
49 from multiple cause of death data (rather than estimates based on hospital patients)  
50 would also allow more detailed analyses to be undertaken, such as investigating  
51  
52  
53  
54  
55  
56  
57  
58  
59  
60

1  
2  
3 geographic or socio-economic inequalities in these deaths. This would be a profitable  
4  
5 area for future research. It also allows a more nuanced debate to take place, which  
6  
7 should now involve policy makers, public health services, primary and emergency care  
8  
9 providers as well as critical care specialists. Ultimately, having this more detailed  
10  
11 picture should enable improved quality of care and more cost-effective use of resources  
12  
13 with respect to preventing, identifying and treating sepsis.  
14  
15  
16  
17  
18  
19  
20  
21  
22  
23  
24  
25  
26  
27  
28  
29  
30  
31  
32  
33  
34  
35  
36  
37  
38  
39  
40  
41  
42  
43  
44  
45  
46  
47  
48  
49  
50  
51  
52  
53  
54  
55  
56  
57  
58  
59  
60

## Figures

Figure 1. Directly age-standardised rates of death definitely, dark grey/black, and maybe, light grey, associated with sepsis, England 2001-10, with 95% confidence interval for the rate.

Figure 2. Age specific death rates for males, dark grey/black, and females, light grey, of deaths definitely associated with sepsis, England, 2001-10, with 95% confidence interval for the rate.

**Tables**

Table 1. Deaths that are definitely associated with sepsis, by underlying cause of death and comparison with all deaths, occurring in England 2001-10 excluding neonatal deaths.

Table 2. Percentage of deaths with given number of diseases or conditions mentioned on the death certificate in deaths definitely associated with sepsis, excluding neonatal deaths, compared with all deaths in England 2001-10.

Table 3. Co-morbidities mentioned on the death certificates of deaths definitely associated with sepsis, excluding neonatal deaths, in England 2001-10.

Table 4: Deaths definitely associated with sepsis, excluding neonatal deaths, compared with all deaths by place of death in England 2001-10.

## **Footnotes**

## **Copyright**

The Corresponding Author has the right to grant on behalf of all authors and does grant on behalf of all authors, an exclusive licence (or non exclusive for government employees) on a worldwide basis to the BMJ Publishing Group Ltd to permit this article (if accepted) to be published in BMJ editions and any other BMJ PGL products and sublicences such use and exploit all subsidiary rights, as set out in our licence.

## **Contributors**

DMcP, CG and MW compiled the list of ICD-10 codes to be searched. AB and EK extracted and tabulated the mortality data and calculated death rates. All authors made substantial contributions to conception and design, acquisition of data, or analysis and interpretation of data. All authors took part in drafting the article or revising it critically for important intellectual content and gave final approval of the version to be published. DMcP is the guarantor.

## **Funding**

The departments of the authors funded this study.

## **Competing interests**

All authors have completed the Unified Competing Interest form at [www.icmje.org/coi\\_disclosure.pdf](http://www.icmje.org/coi_disclosure.pdf) (available on request from the corresponding author) and declare: no support from any organisation for the submitted work; no financial relationships with any organisations that might have an interest in the submitted work in the previous 3 years; no other relationships or activities that could appear to have influenced the submitted work.

## **Ethical Approval**



1  
2  
3 Ethical approval was not required for this study.  
4  
5

6  
7 **Data Sharing**

8 No additional data available. The London Health Observatory holds individual  
9 mortality data but these records cannot be shared under the terms of the data access  
10 agreement with the Office for National Statistics who provide the data.  
11  
12  
13  
14  
15  
16  
17  
18  
19  
20  
21  
22  
23  
24  
25  
26  
27  
28  
29  
30  
31  
32  
33  
34  
35  
36  
37  
38  
39  
40  
41  
42  
43  
44  
45  
46  
47  
48  
49  
50  
51  
52  
53  
54  
55  
56  
57  
58  
59  
60

## References

1. The ACCP/SCCM consensus conference committee. Definitions for sepsis and organ failure and guidelines for the use on innovative therapies in sepsis. *Chest* 1992; 101(6): 1481-3.
2. Levy MM, Fink MP, Marshall JC, et al. SCCM/ESICM/ACCP/ATS/SIS International Sepsis Definitions Conference. *Intensive Care Med* 2003; 29(4): 530-8.
3. Padkin A, Glodfrad C, Brady AR, et al. Epidemiology of severe sepsis occurring in the first 24 hours in intensive care units in England, Wales and Northern Ireland. *Crit Care Med* 2003; 31: 2332-8.
4. Edbrooke DL, Hibbert CL, Kingsley JM, et al. The patient related costs of care for sepsis patients in a UK adult general intensive care unit. *Crit Care Med* 1999; 27(9): 1760-7.
5. Talmor D, Greenberg D, Howell MD, et al. The costs and cost-effectiveness of an integrated sepsis treatment protocol. *Crit Care Med* 2008; 36(4): 1168-74.
6. Jones AE, Troyer JL, Kline JA. Cost effectiveness of an emergency department based early sepsis resuscitation protocol. *Crit Care Med* 2011; 39(6): 1306-12.
7. Suarez D, Ferrer R, Artigas A, et al. Cost-effectiveness of the Surviving Sepsis Campaign protocol for severe sepsis: a prospective nation-wide study in Spain. *Intensive Care Med* 2011; 37(3): 444-452.
8. Karlsson S, Varpula M, Ruokonen E, et al. Incidence, treatment and outcome of severe sepsis in ICU-treated adults in Finland: the Finnsepsis study. *Intensive Care Med* 2007; 33: 435-43.
9. Blanco J, Muriel-Bombin A, Sagredo V, et al. Incidence, organ dysfunction and mortality in severe sepsis: a Spanish multicentre study. *Critical Care* 2008; 12(6): R158.

- 1  
2  
3  
4  
5  
6  
7  
8  
9  
10  
11  
12  
13  
14  
15  
16  
17  
18  
19  
20  
21  
22  
23  
24  
25  
26  
27  
28  
29  
30  
31  
32  
33  
34  
35  
36  
37  
38  
39  
40  
41  
42  
43  
44  
45  
46  
47  
48  
49  
50  
51  
52  
53  
54  
55  
56  
57  
58  
59  
60
10. Martin GS, Mannino DM, Eaton S, Moss M. The Epidemiology of Sepsis in the United States from 1979 through 2000. *New Engl J Med* 2003; 348: 1546-54.
- ~~9~~11. Angus DC, Linde-Zwirble WT, Lidicker J, Clermont G, Carcillo J, Pinsky MR. Epidemiology of severe sepsis in the United States: Analysis of incidence, outcome, and associated costs of care. *Crit Care Med* 2001; 29(7): 1303-10.
- ~~10~~12. Melamed A, Sorvillo FJ. The burden of sepsis-associated mortality in the United States from 1999 to 2005: an analysis of multiple-cause-of-death data. *Critical Care* 2009; 13(1): R28.
- ~~11~~13. Rooney C, Smith SK. Implementation of ICD-10 for mortality data in England and Wales from January 2001. *Health Statistics Quarterly* 2000; 8: 41-50.
- ~~12~~14. Fuller JH, Elford J, Goldblatt P, et al. Diabetes mortality: new light on an underestimated public health problem." *Diabetologia* 1983; 24(5): 336-41.
- ~~13~~15. Griffiths C, Lamagni T, Crowcroft NS, et al. Trends in MRSA in England and Wales: analysis of morbidity and mortality data for 1993-2002. *Health Statistics Quarterly* 2004; 21: 15-22.
- ~~14~~16. Bruce M, Griffiths C, Brock A, et al. Trends in mortality and hospital admissions associated with epilepsy in England and Wales during the 1990s. *Health Statistics Quarterly* 2004; 21: 23-29.
- ~~15~~17. Nath U, Thomson R, Wood R, et al. Population based mortality and quality of death certification in progressive supranuclear palsy (Steele-Richardson-Olszewski syndrome). *J Neurol Neurosurg Psychiatry* 2005; 76: 498-502.
- ~~16~~18. Griffiths C, Rooney C. Trends in mortality from Alzheimer's Disease, Parkinson's disease and dementia in England and Wales 1979-2004. *Health Statistics Quarterly* 2006; 30: 6-14.
- ~~17~~19. Thomas SL, Griffiths C, Smeeth L, et al. Burden of mortality associated with autoimmune diseases among females in the United Kingdom. *Am J Public Health* 2010; 100: 2279-87.

1  
2  
3 | ~~18-20~~.World Health Organisation. International Statistical Classification of Diseases  
4 | and Related Health Problems, Tenth Revision, Volume 1, Tabular List. World  
5 | Health Organization, 1992.  
6  
7

8  
9 | ~~19-21~~.World Health Organisation. International Statistical Classification of Diseases  
10 | and Related Health Problems, Tenth Revision, Volume 3, Alphabetical Index.  
11 | World Health Organization, 1992.  
12  
13

14  
15 | ~~20-22~~.World Health Organization. ICD-10, 2007.  
16 | <http://apps.who.int/classifications/apps/icd/icd10online/>  
17  
18

19  
20 | ~~21-23~~.World Health Organisation. International Statistical Classification of Diseases  
21 | and Related Health Problems, Tenth Revision, Volume 2, Instruction Manual.  
22 | World Health Organization, 1992.  
23  
24

25  
26 | ~~22-24~~.Office for National Statistics. Mortality Statistics: Childhood Infant and  
27 | Perinatal, Series DH3, No. 40. Office for National Statistics, 2009.  
28  
29

30 | ~~23-25~~.Studnek JR, Artho MR, Garner CL, et al. The impact of emergency medical  
31 | services on the ED care of severe sepsis. Am J of Emerg Med 2010; 30: 51-6.  
32  
33

34 | ~~24-26~~.Levy MM, Dellinger RP, Townsend SR, et al. The Surviving Sepsis Campaign:  
35 | results of an international guideline-based performance improvement  
36 | program targetting severe sepsis. Crit Care Med 2010; 38: 367-74.  
37  
38  
39  
40  
41  
42  
43  
44  
45  
46  
47  
48  
49  
50  
51  
52  
53  
54  
55  
56  
57  
58  
59  
60

1  
2  
3  
4  
5  
6  
7  
8  
9  
10  
11  
12  
13  
14  
15  
16  
17  
18  
19  
20  
21  
22  
23  
24  
25  
26  
27  
28  
29  
30  
31  
32  
33  
34  
35  
36  
37  
38  
39  
40  
41  
42  
43  
44  
45  
46  
47  
48  
49  
50  
51  
52  
53  
54  
55  
56  
57  
58  
59  
60

**Appendix**

ICD-10 codes that are definitely or maybe linked with sepsis.

For peer review only

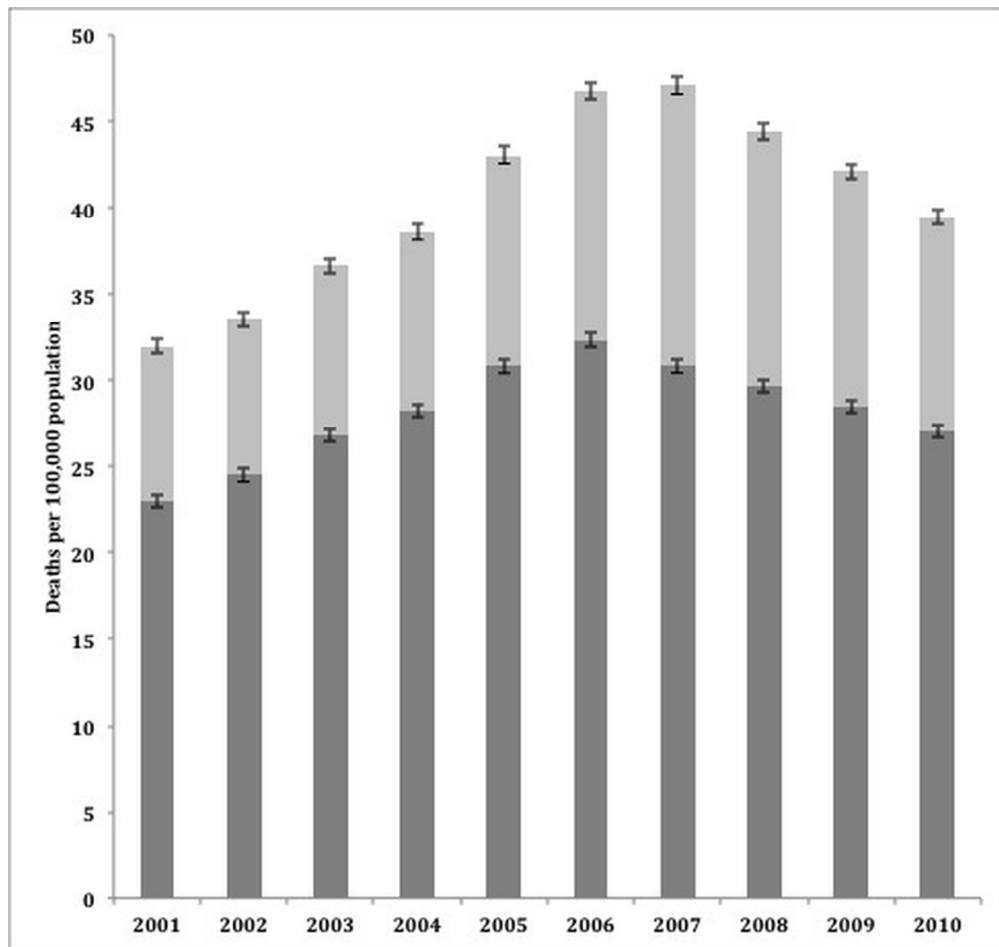

Figure 1. Directly age-standardised rates of death definitely, dark grey, and maybe, light grey, associated with sepsis, England 2001-10, with 95% confidence interval for the rate.  
95x90mm (300 x 300 DPI)

only

1  
2  
3  
4  
5  
6  
7  
8  
9  
10  
11  
12  
13  
14  
15  
16  
17  
18  
19  
20  
21  
22  
23  
24  
25  
26  
27  
28  
29  
30  
31  
32  
33  
34  
35  
36  
37  
38  
39  
40  
41  
42  
43  
44  
45  
46  
47  
48  
49  
50  
51  
52  
53  
54  
55  
56  
57  
58  
59  
60

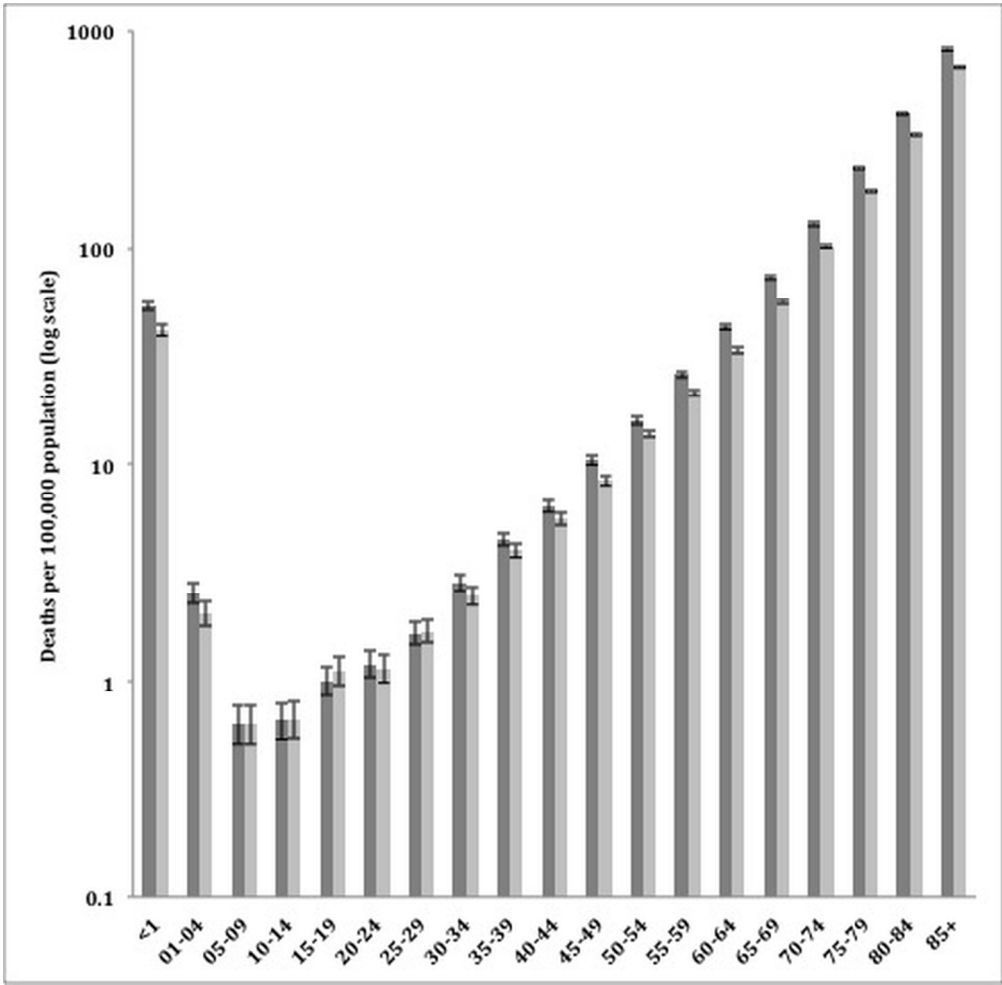

Figure 2. Age specific death rates for males, dark grey, and females, light grey, of deaths definitely associated with sepsis, England, 2001-10, with 95% confidence interval for the rate. 91x90mm (300 x 300 DPI)

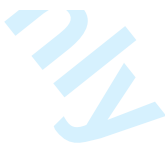

**Appendix**

| <b>Association with sepsis</b> | <b>ICD-10 Chapter</b>                                               | <b>ICD-10 codes</b>                                                                                                                                                            |
|--------------------------------|---------------------------------------------------------------------|--------------------------------------------------------------------------------------------------------------------------------------------------------------------------------|
| <b>Definite</b>                | Infectious and parasitic diseases                                   | A02.1, A20.2, A20.7, A21.7, A22.7, A26.7, A32.7, A39.2, A39.4, A40, A41, A42.7, A48.4, B00.7, B37.7                                                                            |
|                                | Pregnancy, childbirth and the puerperium                            | O85                                                                                                                                                                            |
|                                | Conditions originating in the perinatal period                      | P36, P37.2                                                                                                                                                                     |
|                                | Symptoms, signs and abnormal clinical and laboratory findings       | R57.8                                                                                                                                                                          |
| <b>Maybe</b>                   | Infectious and parasitic diseases                                   | A02.9, A03.9, A04, A20.3, A21.9, A22.8, A22.9, A23.8, A23.9, A24.1, A24.4, A28.2, A28.8, A28.9, A31.0, A32.9, A33, A39.0, A39.1, A39.3, A39.9, A48.0, A49, A54.8, B20.1, B20.7 |
|                                | Diseases of the eye and adnexa                                      | H44.0                                                                                                                                                                          |
|                                | Diseases of the respiratory system                                  | J80, J95.0                                                                                                                                                                     |
|                                | Diseases of the musculoskeletal system                              | M72.9                                                                                                                                                                          |
|                                | Diseases of the genitourinary system                                | N39.0                                                                                                                                                                          |
|                                | Pregnancy, childbirth and the puerperium                            | O08.0, O08.2, O75.3, O86, O88.3                                                                                                                                                |
|                                | Conditions originating in the perinatal period                      | P22.0                                                                                                                                                                          |
|                                | Symptoms, signs and abnormal clinical and laboratory findings       | R02, R50.8, R50.9, R57.9                                                                                                                                                       |
|                                | Injury, poisoning and certain other consequences of external causes | T80.2, T81.4, T82.6, T82.7, T83.5, T83.6, T84.5, T84.6, T84.7, T85.7, T88.0                                                                                                    |
|                                | Additional codes used by WHO for new and emerging conditions        | U04                                                                                                                                                                            |



**STROBE 2007 (v4) checklist of items to be included in reports of observational studies in epidemiology\***  
**Checklist for cohort, case-control, and cross-sectional studies (combined)**

| Section/Topic             | Item # | Recommendation                                                                                                                                                                                                                                                                                                                                                                                                                                                         | Reported on page # |
|---------------------------|--------|------------------------------------------------------------------------------------------------------------------------------------------------------------------------------------------------------------------------------------------------------------------------------------------------------------------------------------------------------------------------------------------------------------------------------------------------------------------------|--------------------|
| Title and abstract        | 1      | (a) Indicate the study’s design with a commonly used term in the title or the abstract                                                                                                                                                                                                                                                                                                                                                                                 | 1                  |
|                           |        | (b) Provide in the abstract an informative and balanced summary of what was done and what was found                                                                                                                                                                                                                                                                                                                                                                    | 2                  |
| <b>Introduction</b>       |        |                                                                                                                                                                                                                                                                                                                                                                                                                                                                        |                    |
| Background/rationale      | 2      | Explain the scientific background and rationale for the investigation being reported                                                                                                                                                                                                                                                                                                                                                                                   | 5                  |
| Objectives                | 3      | State specific objectives, including any pre-specified hypotheses                                                                                                                                                                                                                                                                                                                                                                                                      | 6                  |
| <b>Methods</b>            |        |                                                                                                                                                                                                                                                                                                                                                                                                                                                                        |                    |
| Study design              | 4      | Present key elements of study design early in the paper                                                                                                                                                                                                                                                                                                                                                                                                                | 7                  |
| Setting                   | 5      | Describe the setting, locations, and relevant dates, including periods of recruitment, exposure, follow-up, and data collection                                                                                                                                                                                                                                                                                                                                        | 7                  |
| Participants              | 6      | (a) <i>Cohort study</i> —Give the eligibility criteria, and the sources and methods of selection of participants. Describe methods of follow-up<br><i>Case-control study</i> —Give the eligibility criteria, and the sources and methods of case ascertainment and control selection. Give the rationale for the choice of cases and controls<br><i>Cross-sectional study</i> —Give the eligibility criteria, and the sources and methods of selection of participants | 7                  |
|                           |        | (b) <i>Cohort study</i> —For matched studies, give matching criteria and number of exposed and unexposed<br><i>Case-control study</i> —For matched studies, give matching criteria and the number of controls per case                                                                                                                                                                                                                                                 | N/A                |
| Variables                 | 7      | Clearly define all outcomes, exposures, predictors, potential confounders, and effect modifiers. Give diagnostic criteria, if applicable                                                                                                                                                                                                                                                                                                                               | 7                  |
| Data sources/ measurement | 8*     | For each variable of interest, give sources of data and details of methods of assessment (measurement). Describe comparability of assessment methods if there is more than one group                                                                                                                                                                                                                                                                                   | 7                  |
| Bias                      | 9      | Describe any efforts to address potential sources of bias                                                                                                                                                                                                                                                                                                                                                                                                              | N/A                |
| Study size                | 10     | Explain how the study size was arrived at                                                                                                                                                                                                                                                                                                                                                                                                                              | 7                  |
| Quantitative variables    | 11     | Explain how quantitative variables were handled in the analyses. If applicable, describe which groupings were chosen and why                                                                                                                                                                                                                                                                                                                                           | 7                  |
| Statistical methods       | 12     | (a) Describe all statistical methods, including those used to control for confounding                                                                                                                                                                                                                                                                                                                                                                                  | 7                  |
|                           |        | (b) Describe any methods used to examine subgroups and interactions                                                                                                                                                                                                                                                                                                                                                                                                    | N/A                |
|                           |        | (c) Explain how missing data were addressed                                                                                                                                                                                                                                                                                                                                                                                                                            | N/A                |
|                           |        | (d) <i>Cohort study</i> —If applicable, explain how loss to follow-up was addressed<br><i>Case-control study</i> —If applicable, explain how matching of cases and controls was addressed                                                                                                                                                                                                                                                                              | N/A                |

|                          |     |                                                                                                                                                                                                              |       |
|--------------------------|-----|--------------------------------------------------------------------------------------------------------------------------------------------------------------------------------------------------------------|-------|
|                          |     | <i>Cross-sectional study</i> —If applicable, describe analytical methods taking account of sampling strategy                                                                                                 |       |
|                          |     | (e) Describe any sensitivity analyses                                                                                                                                                                        | N/A   |
| <b>Results</b>           |     |                                                                                                                                                                                                              |       |
| Participants             | 13* | (a) Report numbers of individuals at each stage of study—eg numbers potentially eligible, examined for eligibility, confirmed eligible, included in the study, completing follow-up, and analysed            | 9     |
|                          |     | (b) Give reasons for non-participation at each stage                                                                                                                                                         | N/A   |
|                          |     | (c) Consider use of a flow diagram                                                                                                                                                                           |       |
| Descriptive data         | 14* | (a) Give characteristics of study participants (eg demographic, clinical, social) and information on exposures and potential confounders                                                                     | 9-11  |
|                          |     | (b) Indicate number of participants with missing data for each variable of interest                                                                                                                          | N/A   |
|                          |     | (c) <i>Cohort study</i> —Summarise follow-up time (eg, average and total amount)                                                                                                                             | N/A   |
| Outcome data             | 15* | <i>Cohort study</i> —Report numbers of outcome events or summary measures over time                                                                                                                          | N/A   |
|                          |     | <i>Case-control study</i> —Report numbers in each exposure category, or summary measures of exposure                                                                                                         | N/A   |
|                          |     | <i>Cross-sectional study</i> —Report numbers of outcome events or summary measures                                                                                                                           | N/A   |
| Main results             | 16  | (a) Give unadjusted estimates and, if applicable, confounder-adjusted estimates and their precision (eg, 95% confidence interval). Make clear which confounders were adjusted for and why they were included | 9     |
|                          |     | (b) Report category boundaries when continuous variables were categorized                                                                                                                                    | 9-11  |
|                          |     | (c) If relevant, consider translating estimates of relative risk into absolute risk for a meaningful time period                                                                                             | N/A   |
| Other analyses           | 17  | Report other analyses done—eg analyses of subgroups and interactions, and sensitivity analyses                                                                                                               | N/A   |
| <b>Discussion</b>        |     |                                                                                                                                                                                                              |       |
| Key results              | 18  | Summarise key results with reference to study objectives                                                                                                                                                     | 12    |
| Limitations              | 19  | Discuss limitations of the study, taking into account sources of potential bias or imprecision. Discuss both direction and magnitude of any potential bias                                                   | 12    |
| Interpretation           | 20  | Give a cautious overall interpretation of results considering objectives, limitations, multiplicity of analyses, results from similar studies, and other relevant evidence                                   | 13    |
| Generalisability         | 21  | Discuss the generalisability (external validity) of the study results                                                                                                                                        | 13-14 |
| <b>Other information</b> |     |                                                                                                                                                                                                              |       |
| Funding                  | 22  | Give the source of funding and the role of the funders for the present study and, if applicable, for the original study on which the present article is based                                                | 17    |

\*Give information separately for cases and controls in case-control studies and, if applicable, for exposed and unexposed groups in cohort and cross-sectional studies.

**Note:** An Explanation and Elaboration article discusses each checklist item and gives methodological background and published examples of transparent reporting. The STROBE checklist is best used in conjunction with this article (freely available on the Web sites of PLoS Medicine at <http://www.plosmedicine.org/>, Annals of Internal Medicine at <http://www.annals.org/>, and Epidemiology at <http://www.epidem.com/>). Information on the STROBE Initiative is available at [www.strobe-statement.org](http://www.strobe-statement.org).
